29 October 2020

## **Sodium channel toxin-resistance mutations do not govern batrachotoxin (BTX) autoresistance in poison birds and frogs**

Fayal Abderemane-Ali<sup>1</sup>, Nathan D. Rossen<sup>1</sup>, Megan E. Kobiela<sup>2</sup>, Robert A. Craig II<sup>3</sup>, Catherine E. Garrison<sup>3</sup>, Lauren A. O'Connell<sup>4</sup>, J. Du Bois<sup>3</sup>, John P. Dumbacher<sup>5, 6</sup>, and Daniel L. Minor, Jr.<sup>1, 7-10\*</sup>

<sup>1</sup>Cardiovascular Research Institute

<sup>7</sup>Departments of Biochemistry and Biophysics, and Cellular and Molecular Pharmacology

<sup>8</sup>California Institute for Quantitative Biomedical Research

<sup>9</sup>Kavli Institute for Fundamental Neuroscience

University of California, San Francisco, California 93858-2330 USA

<sup>10</sup>Molecular Biophysics and Integrated Bio-imaging Division

Lawrence Berkeley National Laboratory, Berkeley, CA 94720 USA

<sup>2</sup>School of Biological Sciences, University of Nebraska – Lincoln, Lincoln, Nebraska 68588

<sup>3</sup>Department of Chemistry

Stanford University, Stanford, CA 94305

<sup>4</sup>Department of Biology

Stanford University, Stanford, CA 94305

<sup>5</sup>Institute for Biodiversity Science and Sustainability

California Academy of Sciences, San Francisco, CA 94118, USA

<sup>6</sup>Department of Biology, San Francisco State University, San Francisco, CA 94132, USA

\*Correspondence to: [daniel.minor@ucsf.edu](mailto:daniel.minor@ucsf.edu)

**Short Title: Origin of poison bird and frog BTX resistance**

## Abstract

Poisonous organisms carry small molecule toxins that alter voltage-gated sodium channel (Na<sub>v</sub>) function. Among these, batrachotoxin (BTX) from *Pitohui* toxic birds and *Phyllobates* poison frogs, stands out because of its lethality and unusual effects on Na<sub>v</sub> function. How these toxin-bearing organisms avoid autointoxication remains poorly understood. In poison frogs, a Na<sub>v</sub> DIVS6 pore-forming helix N→T mutation has been proposed as the BTX resistance mechanism. Here, we show that this variant is absent from *Pitohui* and poison frog Na<sub>v</sub>s, incurs a strong cost that compromises channel function, and fails to produce BTX-resistant channels when tested in the context of poison frog Na<sub>v</sub>s. We further show that captive-raised poison frogs are BTX resistant, even though they bear BTX-sensitive Na<sub>v</sub>s. Hence, our data refute the hypothesis that BTX autoresistance is rooted in Na<sub>v</sub> mutations and instead suggest that more generalizable mechanisms such as toxin sequestration act to protect BTX-bearing species from autointoxication.

## Introduction

Many organisms harbor small molecule toxins that target ion channels as a means of defense from predation (1). Among these toxins, batrachotoxin (BTX) is a renowned steroidal amine that is found in distantly related vertebrate lineages including neotropical poison frogs (*Dendrobatidae*) (2) and multiple poisonous bird species (*Pitohui sp.* and *Irita kowaldi*) (3, 4). These animals acquire BTX from their diet (5-7) and accumulate it in their muscles as well as in their skin and feathers where this toxin is used as a predation defense (2, 8). BTX has an unusual mechanism of action against voltage-gated sodium channels (Navs) that facilitates channel opening and prevents channel inactivation (9-12). How vertebrates that bear BTX or other small molecule toxins avoid autointoxication remains unresolved (13-15). Toxin-resistant mutants of target ion channels in the host organisms (16-19) or their predators (20-22) have been suggested as the primary driver of toxin autoresistance (2). *Phyllobates terribilis*, the poison frog carrying the highest BTX levels, is BTX-resistant, even when animals are captive-raised and lack toxin (23), suggesting that BTX resistance is a heritable trait. Partial sequencing of poison frog Navs has suggested a number of Nav mutations that might alter BTX sensitivity (24). One of these, a conserved Domain IV S6 helix (DIVS6) N→T variation in *P. terribilis* skeletal muscle Nav1.4, reduces BTX sensitivity when tested in rat Nav1.4 (25). This result has been used to support the notion that BTX-resistance relies on toxin-resistant channel mutants, similar to examples for tetrodotoxin (TTX) (18-22) and saxitoxin (STX) (17) resistant Navs, and epibatidine-resistant nicotinic acetylcholine receptors (nAChRs) (16). However, this DIVS6 N→T change occurs with very low frequency among wild *P. terribilis* (26) and is absent in wild *Phyllobates aurotaenia* (24, 26), another poison frog species known to carry high BTX levels (27). Further, in the wild there are a number of examples of poisonous frogs (24, 26) and predators of toxic animals (28) that lack toxin-resistant mutations, raising questions about generality of the target-based mechanism. Given these issues and the fact that no functional studies of poison frog Navs have been published, whether BTX-bearing poison animals rely on Nav mutations or some other mechanism for BTX autoresistance remains unresolved.

Here, we cloned and characterized Navs from the BTX-bearing bird *Pitohui uropygialis meridionalis* (Pum) and two poison frog species that carry alkaloid toxins in the wild (*Phyllobates terribilis*, BTX, and *Dendrobates tinctorius*, histrionicotoxin HTX, and pumiliotoxin, PTX). Surprisingly, we did not find the DIVS6 N→T mutation in any of these species even though the poison frog Navs possessed all other mutations suggested to contribute to BTX resistance (24). Further, the *Pitohui* and poison frog Navs were BTX sensitive. Although the DIVS6 N→T mutation

reduced *Pum* Nav BTX sensitivity, in line with its effect in rat Nav1.4 (25), this same mutation failed to confer BTX resistance to poison frog Navs. Additionally, in all cases, DIVS6 N→T greatly compromised channel function, underscoring the tradeoffs between toxin-resistant mutations and fitness cost (29). Most surprising, poison frogs having BTX-sensitive Navs proved resistant to BTX poisoning and resisted poisoning by another small molecule toxin, saxitoxin (STX), despite expressing STX-sensitive Navs. A distantly related poison frog that does not carry BTX (*Mantella*) also proved resistant to BTX and STX. Hence, our studies refute the idea that target Nav mutations are singularly responsible for BTX autoresistance in poisonous birds and frogs, and suggest that other, more general mechanisms such as toxin sequestration (13, 14, 30, 31) defend against autointoxication.



## Results

### Cloning and characterization of skeletal and cardiac *Pitohui* Navs

*Pitohui* is one of only a few bird genera known to carry BTX (3, 4, 32) and has BTX levels in its skeletal and cardiac muscles that should alter Nav function (8). To investigate possible mechanisms of BTX resistance, we used a *Pitohui* genomic DNA library to identify and assemble genes for two *Pitohui uropygialis meridionalis* Navs, skeletal muscle *Pum* Nav1.4 (Fig. S1) and cardiac *Pum* Nav1.5 (Fig. S2). Primary sequence alignment showed extensive similarities between *Pum* Nav1.4, *Pum* Nav1.5, and other vertebrate homologs (~73% amino acid identity) (Figs. S1 and S2), including hallmark Nav features, such as: a selectivity filter 'DEKA' motif, canonical RXXR repeats in S4 in all four voltage sensor domains, and the 'IFM' motif responsible for fast inactivation (33) (Figs. S1 and S2).

Whole-cell patch clamp electrophysiology of *Pum* Nav1.4 and *Pum* Nav1.5 transfected into HEK293 cells demonstrated that both have fast voltage-dependent activation followed by a fast and complete voltage-dependent inactivation typical of Navs (Figs. 1a-b, S3a-b, and Tables 1 and S1) similar to human Nav1.4, *Hs* Nav1.4, recorded under identical conditions (Fig. 1c-d, Tables 1 and S1). Because Navs can harbor resistance mutations to other small molecule toxins (13, 14, 17, 20), we anticipated that the *Pitohui* Navs might be BTX-resistant. Surprisingly, application of 10  $\mu$ M BTX drastically altered the function of both *Pum* Navs, yielding typical BTX-induced functional consequences: a hyperpolarized shift in the voltage-dependency of activation ( $\Delta V_{1/2 \text{ BTX}} = -33.6 \pm 1.2$  and  $-37.4 \pm 1.8$  for *Pum* Nav1.4 and *Pum* Nav1.5, respectively), reduced inactivation, and enhanced tail currents (10, 11) (Figs. 1a-b and S3a-b, Table 1). The BTX-induced activation curve follows a double Boltzmann function in which the first and second components arise from BTX-bound and unmodified channels, respectively (34). Notably, the BTX-induced changes were equivalent to those elicited by BTX application to *Hs* Nav1.4 ( $\Delta V_{1/2 \text{ BTX}} = -35.9 \pm 1.8$ ) (Fig. 1d, Table 1). These data demonstrate that despite the fact that *Pitohui* carry BTX in its skeletal muscles and heart (8), their skeletal and cardiac Navs are BTX-sensitive. Thus, autoresistance cannot originate from altered BTX sensitivity in the two most likely target channels exposed to lethal BTX levels.

Navs are often co-expressed with auxiliary  $\beta$  subunits that can alter their biophysical (35) and pharmacological (36, 37) properties. To test whether this subunit could impact BTX resistance, we identified the *Pitohui uropygialis meridionalis* gene encoding for a transmembrane protein bearing the key features of Nav $\beta$ 2, including a pair of conserved disulfides (38). (Fig. S3c).

Co-expression of *Pum* Nav $\beta$ 2 with *Pum* Nav1.4 had no impact on channel biophysical properties or on BTX responses relative to *Pum* Nav1.4 alone (Fig. S3d-e, Tables 1 and S1). Thus, *Pum* Nav1.4 alone and *Pum* Nav1.4 in combination with *Pum* Nav $\beta$ 2 failed to show evidence of BTX-resistant channels.

### Cloning and characterization of poison frog Navs

Poison frogs in the genus *Phylllobates* (Family *Dendrobatidae*) are the most well-known BTX carriers (2, 27, 39). A number of studies have identified amino acid substitutions hypothesized to contribute to poison frog Nav BTX resistance (24-26). However, cloning and functional characterization of poison frog Navs is noticeably absent from the literature. We used skeletal muscle from captive-raised members of two representative poison frog species, one that carries high levels of BTX in the wild, *Phylllobates terribilis* (*Pt* Nav1.4) (23, 24, 40) and one not known to carry BTX, *Dendrobates tinctorius* (*Dt* Nav1.4) (24), to clone poison frog Nav1.4s. Consistent with evolutionary relationships between the two species (24, 26), *Pt* Nav1.4 and *Dt* Nav1.4 were highly similar to each other (~95% amino acid identity) and other vertebrate Navs (~73% amino acid identity), and bore all Nav hallmarks (Fig. S1). Importantly, their DIS6 and DIVS6 sequences were identical to those reported previously (24) with the remarkable absence in *Pt* Nav1.4 of the proposed BTX-resistance mutation DIVS6 N $\rightarrow$ T (*Pt* Nav1.4 Asn1600, *Pt* Nav1.4 N1584T (rat numbering) (25)) (Fig. S1, Table S2). Genomic DNA sequencing covering the *Pt* Nav1.4 DIVS6 yielded nucleotide sequences identical to those obtained from cDNA and cross-validated the absence of the DIVS6 N $\rightarrow$ T substitution. These findings are consistent with the observation that the DIVS6 N1600T substitution has a very low frequency among wild *P. terribilis* (26). Besides the prior reported amino acid variants (24), *Pt* Nav1.4 and *Dt* Nav1.4 had 93 additional positions distributed throughout the channel that differed from conserved bird, human, and rat Nav1.4 residues (Fig. S4, Table S2). Although we could readily sequence the *Pt* Nav1.4 and *Dt* Nav1.4 genes, both proved prone to recombination and deletion upon passage through *E. coli*, rendering the native DNA sequences impossible to handle. To solve this problem, we re-designed the codon usage to preserve the amino acid sequence of both. These re-designed genes were well behaved and allowed us to conduct electrophysiological characterization of *Pt* Nav1.4 and *Dt* Nav1.4 in mammalian and amphibian expression systems.

Whole-cell patch clamp electrophysiology of HEK293 cells transfected with *Pt* Nav1.4 and *Dt* Nav1.4 yielded voltage-dependent channels that matched the properties of both *Pum* and *Hs* Nav1.4s (Fig. 1e-h, Tables 1 and S1). Strikingly, both poison frog Navs had the same response as *Pum* and *Hs* Nav1.4 to 10  $\mu$ M BTX (Fig. 1e-h), ( $\Delta V_{1/2 \text{ BTX}} = -30.0 \pm 2.1$  and  $-37.9 \pm 2.0$  mV for

*Pt* Nav1.4 and *Dt* Nav1.4, respectively), demonstrating that these poison frog channels are not resistant to BTX and ruling out the possibility that the >90 amino acid variants between poison frog and human channels, including the previously proposed changes in DIS6 and DIVS6 (24), could cause BTX-resistance.

Because expression of amphibian channels in an amphibian cell could provide a more native-like context, we also expressed *Pt* Nav1.4 and *Dt* Nav1.4 in *Xenopus* oocytes and examined their function by two-electrode voltage clamp. Both channels had biophysical parameters that matched those measured in mammalian cells (Fig. S5a-d, Table 1). Further, BTX application caused the strong hallmark functional modification observed for all of the other channels we studied (Figs 1, S3a-b and d-e, and S5a-d), including voltage-dependent activation shifts comparable to those measured in mammalian cells ( $\Delta V_{1/2 \text{ BTX}} = -33.1 \pm 3.2$  and  $-30.0 \pm 2.1$ ; and  $-37.8 \pm 6.1$  and  $-37.9 \pm 2.0$  mV for *Pt* Nav1.4 and *Dt* Nav1.4 expressed in *Xenopus* oocytes and HEK293 cells, respectively). The shift was more complete in oocytes (*cf.* Figs. 1f and h and S5b and d), a result that likely originates from the fact that for technical reasons BTX was injected into the oocytes rather than applied by bath application as for mammalian cells. Taken together, the biophysical characterization of *Pt* Nav1.4 and *Dt* Nav1.4 demonstrates that these channels are not BTX-resistant. Our combined observations that Navs from two classes of BTX-carrying animals, *Pitohui* and *P. terribilis*, are vulnerable to BTX challenge the idea that Nav mutation is the BTX autoresistance strategy as suggested for poison frogs such as *P. terribilis* (24, 25).

### **DIVS6 N→T mutation fails to confer BTX resistance to poison frog Navs**

Because the DIVS6 N→T mutation was absent from Navs of BTX-bearing species, we wondered whether the observation that DIVS6 N→T could confer BTX resistance to rat Nav1.4 (25) was impacted by the >90 amino acid differences between poison frog and mammalian Navs (Fig. S4, Table S2). Therefore, we placed the DIVS6 N→T mutation in poison bird, human, and poison frog Nav1.4s (*Pum* Nav1.4 N1609T, *Hs* Nav1.4 N1591T, *Pt* Nav1.4 N1600T, and *Dt* Nav1.4 N6100T) and measured its effects on channel function and BTX sensitivity. Consistent with studies of rat Nav1.4 DIVS6 N→T (25), DIVS6 N→T eliminated the ability of BTX to block inactivation and induce large tail currents in *Pum* Nav1.4 and *Hs* Nav1.4 (Fig. 2a-d). Nevertheless, the bird and human Nav1.4s were not rendered completely BTX resistant. Application of 10  $\mu$ M BTX shifted the voltage-dependent activation of both channels, making them more easily opened by voltage ( $\Delta V_{1/2 \text{ BTX}} = -11.4 \pm 3.2$  and  $-14.2 \pm 5.5$  mV for *Pum* Nav1.4 N1609T and *Hs* Nav1.4 N1591T, respectively) (Fig. 2b and d, Table 1). Further, the BTX-induced double Boltzmann was lost (Fig. 2b and d), suggesting an enhanced BTX affinity. Due to its limited effectiveness in blocking

the effects of BTX in the bird and human channels, we revisited the consequences of the DIVS6 N→T mutation in rat Nav1.4 (*Rn* Nav1.4). Similar to the results with bird and human channels, DIVS6 N→T reduced but did not eliminate *Rn* Nav1.4 channel BTX sensitivity (Figure S6a-d). Application of 10 μM BTX shifted the voltage-dependent activation of both *Rn* Nav1.4 and *Rn* Nav1.4 N1584T making them more easily opened by voltage ( $\Delta V_{1/2 \text{ BTX}} = -45.6 \pm 0.4$  and  $-40.3 \pm 2.8$  mV for *Rn* Nav1.4 and *Rn* Nav1.4 N1584T, respectively) (Fig S6b and d, Table 1). Thus, DIVS6 N→T was unable to mitigate the effects of BTX completely in any Nav orthologues.

In all three contexts, DIVS6 N→T also affected channel biophysical properties (Figs. S6e-g, S7a-h, Tables 1, S1 and S3). DIVS6 N→T rendered *Pum* Nav1.4, *Hs* Nav1.4 and *Rn* Nav1.4 more difficult to open, shifting the activation voltage dependence to depolarizing potentials ( $\Delta V_{1/2} = +20.5 \pm 1.5$ ,  $+16.9 \pm 2.7$ , and  $+18.0 \pm 0.6$  mV for *Pum* Nav1.4 N1609T, *Hs* Nav1.4 N1591T, and *Rn* Nav1.4 N1584T, respectively) (Figs. S6e, S7b and f, Tables 1 and S3), and made the channels easier to inactivate, shifting the voltage dependence of steady state inactivation towards hyperpolarizing potentials ( $\Delta V_{1/2 \text{ inact}} = -10.3 \pm 2.1$ ,  $-9.8 \pm 1.2$  and  $-27.0 \pm 0.4$  mV for *Pum* Nav1.4 N1609T, *Hs* Nav1.4 N1591T and *Rn* Nav1.4 N1584T, respectively) (Figs. S6f, S7c and g, Tables S1 and S3). Further, DIVS6 N→T diminished *Pum* Nav1.4 N1609T, *Hs* Nav1.4 N1591T and *Rn* Nav1.4 N1584T current densities by 79%, 55% and 90%, respectively (Figs. S6a, c, and g, and S7a, d, e, and h, Tables 1 and S3). Thus, the DIVS6 N→T change incurs a substantial functional cost.

To probe the DIVS6 Asn site further, we examined the consequences of mutation to alanine in *Pum* Nav1.4. *Pum* Nav1.4 N1609A phenocopied the biophysical changes measured for N1609T producing channels that were more difficult to open ( $\Delta V_{1/2} = +19.6 \pm 1.6$ ), easier to inactivate ( $\Delta V_{1/2 \text{ inact}} = -13.4 \pm 1.6$ ), and had current density reduced by 76% (Fig. S7a-d, Tables 1, S1, and S3), in agreement with the reduced channel activity reported for the corresponding rat Nav1.4 mutant (41, 42). These biophysical changes match those of the BTX-resistant *Pum* Nav1.4 N1609T; however, *Pum* Nav1.4 N1609A retained all of the classical BTX responses such as reduction of inactivation, enhanced tail current, and a leftward shift of the activation voltage dependence (Fig. S7i-j, Tables 1 and S3). The failure of the N1609A to diminish BTX sensitivity shows that the reduction of BTX sensitivity in *Pum* Nav1.4 N1609T, *Hs* Nav1.4 N1591T, and *Rn* Nav1.4 N1584T is a specific effect of the threonine mutation, and not a consequence of the changes in channel biophysical properties or current density reduction (Table S3).

To our surprise, placing DIVS6 N→T in both poison frog Nav1.4s failed to blunt the effects of BTX on channel activation and inactivation (Fig. 2e-h) ( $\Delta V_{1/2 \text{ BTX}} = -30.0 \pm 2.1$ ,  $-30.8 \pm 2.5$  mV for

*Pt* Nav1.4 and *Pt* Nav1.4 N1600T, respectively and  $-37.9 \pm 2.0$  and  $-37.8 \pm 1.8$  for *Dt* Nav1.4 and *Dt* Nav1.4 N1600T, respectively). Hence, even though the DIVS6 N→T change reduces *Pum* Nav1.4, *Hs* Nav1.4, and *Rn* Nav1.4 BTX responses (Figs. 2a-d, S6a-d), this same change fails to affect the BTX sensitivity of poison frog Navs. Unlike its effects in *Pum*, *Hs*, and *Rn* Navs, DIVS6 N→T did not cause major changes in poison frog Nav biophysical properties, shifting only the inactivation voltage dependence by -10 mV while leaving the activation voltage dependence and current density unchanged (Fig. S8a-c, Tables 1, S1, and S3). However, expression of *Pt* Nav1.4 N1600T and *Dt* Nav1.4 N1600T in *Xenopus* oocytes revealed dramatic reductions in channel activity (Fig. S8d-h) that prevented measurement of channel biophysical properties and BTX responses. These results reveal that DIVS6 N→T is detrimental to function and may interfere with channel folding and maturation in a manner that is accentuated at lower temperatures, such as those used to store incubate the oocytes. This context-dependent loss of function indicates that the DIVS6 N→T variant exacts a functional cost that, together with its ineffectiveness in endowing poison frog Navs with BTX resistance, refutes the idea that DIVS6 N→T could serve as an effective BTX autoresistance mechanism.

### **Cost of the conserved N→T mutation is context dependent**

The varied outcomes of DIVS6 N→T on BTX sensitivity among the poison bird, human, rat, and poison frog Navs highlight the importance of context in determining the functional consequences of mutations. Because the equivalent residue is conserved in all four S6 helices (Figs. S1 and S2), we systematically introduced S6 N→T into each of the *Pum* Nav1.4 S6 segments and measured channel properties and BTX responses to investigate the question of context dependent effects further (Fig. 3). Whole cell patch clamp recordings from HEK293 cells transfected with these mutant channels revealed clear, domain-specific differences. Contrasting the effect of DIVS6 N→T (Fig. S7b), voltage-dependent activation of channels having the N→T mutation in DI, DII, or DIII (*Pum* Nav1.4 N432T (DI), *Pum* Nav1.4 N830T (DII), and *Pum* Nav1.4 N1306T (DIII)) was unchanged relative to wild-type ( $V_{1/2} = -20.2 \pm 1.9$ ,  $-22.4 \pm 1.0$ ,  $-26.7 \pm 1.0$ , and  $-23.4 \pm 1.0$  mV for *Pum* Nav1.4 N432T (DI), *Pum* Nav1.4 N830T (DII), *Pum* Nav1.4 N1306T (DIII), and *Pum* Nav1.4, respectively) (Figs. 3a-j, S9a-b, and Tables 1 and S3). By contrast, we found varied effects on steady state inactivation. DI and DIII changes showed wild-type like behavior, whereas the DII mutant had a ~10 mV hyperpolarizing shift ( $V_{1/2 \text{ inact}} = -61.2 \pm 1.6$ ,  $-75.0 \pm 0.9$ ,  $-65.3 \pm 1.0$ , and  $-64.2 \pm 1.3$  mV for *Pum* Nav1.4 N432T (DI), *Pum* Nav1.4 N830T (DII), *Pum* Nav1.4 N1306T (DIII), and *Pum* Nav1.4, respectively) (Fig. S9c, Tables S1 and S3). All three had strong BTX responses similar to wild-type

( $\Delta V_{1/2 \text{ BTX}} = -30.8 \pm 2.1$ ,  $-31.6 \pm 2.0$ ,  $-36.9 \pm 1.4$ , and  $-33.6 \pm 1.2$  mV for *Pum Nav1.4 N432T* (DI), *Pum Nav1.4 N830T* (DII), *Pum Nav1.4 N1306T* (DIII), and *Pum Nav1.4*, respectively) (Fig. 3, Tables 1 and S3). Thus, the only site where the conserved S6 N→T change affects BTX responses is in DIVS6, in line with its proposed contribution to the BTX binding site (25).

As with the biophysical changes, the effects on current density from placing the N→T change in different channel domains were not uniform. The DIS6 and DIIS6 N→T mutants had current densities matching wild-type (Figs. 3a, c, g, S9a and d, and Tables 1 and S3), whereas, DIIS6 N→T lowered the current density and was more detrimental to channel activity than DIVS6 N1609T or N1609A (Figs. 3a, e, S9a and d, and Tables 1 and S3). Together, these data show that there is no correlation between changes in channel biophysical properties and the acquisition of BTX resistance and are in line with the results from DIVS6 N→T and N→A mutants (Figs. 2, S7, and S8, Table S3).

Consideration of the conserved S6 asparagine structural context provides insight into the context-dependent effects. The two S6 sites where N→T has no impact on channel biophysics, BTX responses, or current density, DIS6 and DIIS6, occupy positions that are partially exposed to the channel inner pore (Fig. S9e-f). By contrast, the two positions that affect channel biophysics and current density, DIIS6 and DIVS6, interact with the S4-S5 linkers (43) (Fig. S9e-f) and altering these buried sites comes with substantial functional costs. Hence, DIVS6 N→T carries major disadvantages for protecting animals such as *Pitohui* and poison frogs against BTX autointoxication.

### **Toxin-free poison frogs are BTX resistant in the absence of the DIVS6 N→T mutation**

The surprising observation that Navs from BTX-carrying birds and frogs remain BTX-sensitive raised the question of whether the species from which we cloned the channels were actually BTX resistant. Because of difficulties in obtaining live animals, we were unable to investigate *Pitohui* BTX resistance. Captive-raised poison frogs lack BTX, as this toxin is acquired in the wild from their diet (5, 6). Thus, it was possible that the toxin-free poison frogs used to clone Navs were not BTX resistant due to the absence of selective pressure from the toxin, a possibility underscored by the high functional cost of DIVS6 N→T (Figs. 2e-h and S8, Tables 1, S1 and S3). To test whether captive-raised poison frogs were BTX resistant, we conducted a series of toxin challenge experiments using five different frog species: two non-poisonous frogs (*Xenopus laevis* and *Polypedates leucomystax*), two captive-raised poison frogs that carry alkaloid toxins in the wild (*Phylllobates terribilis*, BTX; *Dendrobates tinctorius*, histrionicotoxins HTX, and pumiliotoxins, PTX), and an unrelated captive-raised Malagasy poison frog that carries PTX rather than BTX in



the wild (*Mantella aurantiaca*) and represents an independent evolutionary origin of chemical defenses (44-46). We challenged these animals with three different toxins that target Na<sub>v</sub>s: BTX, and two guanidinium toxins that act by a pore-blocking mechanism, saxitoxin (STX) (47, 48), and tetrodotoxin (TTX) (48).

We assessed the duration of recovery from anesthesia-induced paralysis following intramuscular injection of each toxin at 20 times the lethal dose based on values for mice (LD<sub>50</sub>) by monitoring how long it took the frog to show clear motor activity relative to injection of a phospho-buffered saline (PBS) control. Following BTX injection, *Xenopus laevis* and *Polypedates leucomystax* displayed an accelerated recovery from anesthesia that was at least two times faster than PBS injections (PBS and BTX recovery times: 29 ± 1 min. and 15 ± 5 min., and 169 ± 12 min. and 70 ± 20 min. for *X. laevis* and *P. leucomystax*, respectively) (Fig. 4a-b and f, Table S4). After the initial recovery, BTX was ultimately lethal to *X. laevis* (Fig. 4a and f). By contrast, BTX injection did not change the anesthesia recovery time or kill any of the poison frogs, regardless of whether they carry BTX in the wild environment (*P. terribilis*) or are naturally BTX-free but harbor other alkaloid toxins (*D. tinctorius*, *M. aurantiaca*) (Fig. 4c-f, Table S4). Responses to STX also revealed differences between non-poisonous and poison frogs. STX injection was lethal to *X. laevis* and *P. leucomystax* (Fig. 4a-b and f), whereas all three poison frogs fully recovered from anesthesia after STX injections (Fig. 4c-f). TTX was lethal to *X. laevis* (Fig. 4a and f). Although TTX caused extended paralysis in all other tested frogs, it was not lethal (Fig. 4a-f, Table S4). Thus, all tested poisonous frogs showed resistance to all three toxins while non-poisonous frogs were vulnerable to either BTX and STX (*P. leucomystax*) or all three toxins (*X. laevis*) (Fig. 4f).

The striking differences in BTX-induced accelerated recovery from anesthesia between the non-poisonous and poisonous species was unexpected. Studies of eukaryotic and prokaryotic Na<sub>v</sub>s suggest that BTX and local anesthetics, such as the tricaine used for frog anesthesia, have overlapping binding sites within the channel pore (49-52). We considered that the differences in BTX-dependent accelerated recovery from anesthesia were a physiological manifestation of this molecular competition and indicated that BTX was engaging the target channels in non-poisonous frogs but not in poison frogs. Hence, we tested whether tricaine and BTX produced competing effects on *Pt* Na<sub>v</sub>1.4 and *Dt* Na<sub>v</sub>1.4. Consistent with its anesthetic effects on the frogs, 0.5 mM tricaine inhibited both poison frog Na<sub>v</sub>s and had similar effects on the *Pum* Na<sub>v</sub>1.4 control (Fig. S10a-c and g). Subsequent BTX injection into the same tricaine-treated oocytes caused a complete relief of the tricaine block (Fig. S10a-c and g), in line with a direct competition between tricaine and BTX. By contrast, in the absence of tricaine, this dramatic BTX-induced increase in

peak current was absent (Fig. S10d-f and h). These data demonstrate that the poison frog  $\text{Na}_v$ s are competent for BTX-tricaine competition. Hence, the differences in BTX-induced accelerated recovery from anesthesia reflect the direct competition of the two compounds on the channel in the non-poisonous frogs and suggest that the poison frogs have a means to prevent BTX from engaging their  $\text{Na}_v$ s.

The poison frog STX resistance we observed could be explained by a lack of  $\text{Na}_v$  sensitivity to this toxin. To test this possibility, we compared the responses of *Pt*  $\text{Na}_v1.4$ , *Dt*  $\text{Na}_v1.4$ , and *Pum*  $\text{Na}_v1.4$  as a control, to STX and TTX as the former had minimal effect on the poison frogs, whereas the latter caused potent paralysis (Fig. 4, Table S4). Extracellular application of increasing STX concentrations inhibited all three  $\text{Na}_v$ s with a nanomolar response that matched other  $\text{Na}_v$ s (47, 53, 54) ( $\text{IC}_{50} = 12.6 \pm 1.4$  nM,  $14.6 \pm 0.6$  nM and  $7.3 \pm 0.5$  nM for *Pt*  $\text{Na}_v1.4$ , *Dt*  $\text{Na}_v1.4$  and *Pum*  $\text{Na}_v1.4$ , respectively) (Fig. S11a-d). *Pt*  $\text{Na}_v1.4$  and *Dt*  $\text{Na}_v1.4$ , and the control *Pum*  $\text{Na}_v1.4$  also had nanomolar TTX responses, similar to *Hs*  $\text{Na}_v1.4$  (55), ( $\text{IC}_{50} = 21.3 \pm 1.0$  nM,  $40.8 \pm 1.8$  nM, and  $6.2 \pm 0.4$  nM for *Pt*  $\text{Na}_v1.4$ , *Dt*  $\text{Na}_v1.4$ , and *Pum*  $\text{Na}_v1.4$ , respectively) (Fig. S11e-h). Thus, the ability of the poison frogs to resist STX does not arise from their  $\text{Na}_v$ s having some unusual resistance to the toxin (Figs. 4, S11d and Table S4). The resistance of poison frogs to the effects of BTX and STX contrasts with the effects of TTX and is not consistent with the high sensitivity of their  $\text{Na}_v1.4$ s to all three toxins. These findings suggest that mechanisms, such as toxin sequestration, may prevent BTX and STX from reaching their target  $\text{Na}_v$ s.



## Discussion

Poisonous organisms that use toxins as defensive molecules must avoid autotoxication. Such resistance has been proposed to arise from three strategies: 1) acquisition of target protein toxin resistance mutations, 2) toxin sequestration, and 3) enhanced detoxification or elimination capacity (13, 14). Support for the first mechanism includes prominent examples of TTX-resistant  $\text{Na}_v$ s in toxin-bearing species and their predators (18-22), STX-resistant  $\text{Na}_v$ s in mollusks (17), and epibatidine-resistant nAChRs in poison frogs (16). Because of these examples and the suggestion that the  $\text{Na}_v$  DIVS6 N $\rightarrow$ T mutation might confer BTX-resistance to poison frogs (25), we expected to find toxin resistant mutants in poison bird and frog  $\text{Na}_v$ s. Instead, we found multiple lines of evidence demonstrating that  $\text{Na}_v$ s from both poison birds and frogs are highly sensitive to BTX and lack the DIVS6 N $\rightarrow$ T change. Further, even though the DIVS6 N $\rightarrow$ T mutation alters the BTX-responses of bird, human, and rat  $\text{Na}_v1.4$ s (Figs. 2a-d and S6a-d), it failed to have any effect on the BTX-sensitivity of poison frog  $\text{Na}_v$ s (Fig. 2e-h), a result that highlights the importance of vetting putative toxin-resistance mutations in the context of the native channel (16).

How amino acid changes compensate for mutations that alter function is complex and can arise from effects at positions that are far apart in the protein structure (56-59). There are >90 amino acid differences between the poison frog and human  $\text{Na}_v1.4$ s (Fig. S4, Table S2) and it is not obvious which variants in the frog  $\text{Na}_v$ s suppress the ability of DIVS6 N $\rightarrow$ T to affect BTX responses. The importance of context is further evident from the fact that even though the Asn position is conserved in all four  $\text{Na}_v$  pore domain subunits, the functional consequences of the N $\rightarrow$ T change are domain-dependent (Fig. 3, Table S3). These factors, together with the absence of DIVS6 N $\rightarrow$ T in BTX-bearing birds and frogs (Fig. S1-S2) (24, 26) and its ineffectiveness in poison frog  $\text{Na}_v$ s rule out the target-alteration hypothesis for BTX resistance.

Endowing a protein with a new function through mutation often incurs a cost, particularly with respect to protein stability (57-59). Our data show that the DIVS6 N $\rightarrow$ T change in bird, human, rat, and frog  $\text{Na}_v$ s carries substantial functional costs that affect every aspect of channel function, in line with its role in coupling the pore to the voltage-sensor domain in  $\text{Na}_v$ s (42), by inducing changes that render the channels more difficult to open, more readily inactivated, and that reduce current density (Table S3), an effect that likely reflects stability penalties that impact channel biogenesis. Similar perturbations of  $\text{Na}_v$  inactivation and reduction of current levels have profound physiological consequences (60) and are linked to a variety of channelopathies (61), underscoring the organism-level fitness problems incurred by changes in  $\text{Na}_v$  biophysical properties. These

substantial fitness costs, as well as the inability of the DIVS6 N→T mutation to affect the BTX responses of poison frog Navs are consistent with the low frequency of this variant in wild *P. terribilis* (26) and its absence from the BTX-bearing *P. aurotaenia* poison frog (24). Other studies of ion channel toxin resistance mutants have uncovered various degrees of functional costs that may be compensated by amino acid changes at additional sites in the channel (16, 62). Hence, the effectiveness of developing a toxin-resistant channel via mutation is highly dependent on the cost for evolving this new function and the extent to which functional costs can be mitigated by additional changes.

Poison frogs lacking the Nav1.4 DIVS6 N→T change withstand BTX levels that affect non-poisonous frogs (Fig. 4, Table S4), in line with previous studies (23). In non-poisonous frogs, we find clear *in vivo* physiological antagonism between the channel blocker, tricaine, and the channel opener, BTX, that indicates both compounds access the target Navs. This antagonism is absent in poison frogs (Fig. 4, Table S4) even though it can occur at the molecular level of the channel (Fig. S10). Further, the resistance of poison frogs to BTX and STX contrasts with the effects of TTX and is not consistent with the high sensitivity of their Nav1.4s to all three toxins (Figs. 4, S10-S11). Together these observations suggest that poison frogs have a means to prevent BTX and STX from reaching their Navs. It is notable that other frogs resist STX poisoning (31, 63, 64) and it is thought that the soluble STX binding protein saxiphilin (13, 31, 65) acts as a 'toxin sponge' to sequester and neutralize the lethal effects of this and possibly other neurotoxins (13, 14, 30, 31, 66, 67).

If BTX-bearing animals do not use BTX-resistant Navs to avoid autointoxication, how do they survive? Apart from the absence of BTX-resistant Navs, the diversity among >800 poison frog alkaloid toxins (44), the seasonal and geographical variation of these toxins, and ability to affect multiple ion channels (2) pose major challenges for evolving toxin resistant channels. Enhanced detoxification via metabolic toxin destruction would also not be useful as these poisonous organisms need to handle and store the toxins to deploy them against predators. By contrast, sequestration strategies not only offer a general means of toxin protection, but could act in pathways involved in safely transporting and concentrating toxins in key defensive organs such as the skin (32). The fact that toxin-based chemical defense systems have evolved independently four times in neotropical poison frogs (Dendrobatids)(2), in Malagasy poison frogs (46), and in multiple lineages of poisonous birds (including *Pitohui* and *Ifrita*)(3, 4) supports the idea that such general sequestration mechanisms may underlie toxin autoresistance. Although no BTX-binding proteins have been yet identified, high-affinity toxin binding proteins for STX in frogs, saxiphilin

(30, 31, 65) and TTX in pufferfish, Pufferfish Saxitoxin and Tetrodotoxin Binding Protein (68, 69) are known and have been proposed to prevent autointoxication through sequestration (13). Characterizing how such toxin-binding proteins protect hosts from autointoxication, alone or together with specialized toxin transport pathways, should provide new insights into the fundamental mechanisms of toxin autoresistance, expand understanding of how organisms handle a range of chemical insults, and may lead to the discovery of antidotes against various toxic agents.

## Acknowledgements

We thank J. McGlothlin (Virginia Tech) for providing annotated sequences of crow Navs, G. Loussouarn (l'institut du thorax, Nantes) for providing human Nav clones, Z. Chen for technical assistance, and K. Brejc for comments on the manuscript. We thank the Papua New Guinea National Research Institute and Department of Environment and Conservation for permission to conduct fieldwork, the generous people of Bonua Village for assistance in the field permission to work on their land, and the National Geographic Society for funding the fieldwork. This work was supported by grants NIH-NHLBI R01-HL080050 and NIH-NIDCD R01 DC007664 to D.L.M., NSF-1822025 to L.A.O, partial support of this work from NIH-NIGMS GM117263-01A1 to J.D.B, an American Ornithological Society Wetmore Research Award to M.E.K., an NIH-NIGMS F32GM116402 postdoctoral fellowship to R.A.C., and an American Heart Association postdoctoral fellowship to F.A.-A.

## Author Contributions

F.A.-A., M.E.K., R.A.C., C.E.G., J.D.B, J.P.D. and D.L.M. conceived the study and designed the experiments. F.A.-A., N.D.R., R.A.C., and C.E.G. performed patch clamp electrophysiology experiments and analyzed the data. F. A.-A. performed *de novo* Nav cloning, molecular biology experiments, two-electrode voltage clamp electrophysiology experiments, toxin challenge experiments, and analyzed the data. M.E.K. and J.P.D. constructed and analyzed *Pitohui* genomes. J.D.B. synthesized BTX. J.D.B., J.P.D, and D.L.M analyzed data and provided guidance and support. F.A.-A., L.A.O., J.D.B., J.P.D, and D.L.M. wrote the paper.

## Competing interests

J.D.B. is a cofounder and holds equity shares in SiteOne Therapeutics, Inc., a start-up company interested in developing subtype-selective modulators of sodium channels.

The other authors declare no competing interests.

## Data and materials availability

Sequences of *Pum* Nav1.4, *Pum* Nav1.5, *Pum* Navβ2, *Pt* Nav1.4, and *Dt* Nav1.4 will be deposited with NCBI and released upon publication.

Requests for material to D.L.M.

# Materials and Methods

## Identification and cloning of *Pitohui* Nav1.4, Nav1.5, and Navβ2

Genomic DNA from *Pitohui uropygialis meridionalis* (Family Oriolidae) blood and tissue was extracted using DNeasy kits (Qiagen) to create whole genome sequence libraries for the poisonous *Pitohui* birds. Tissue samples were collected in 1989 from near the village of Bonua, Central Province, Papua New Guinea (10°08'S by 149°10'30" E), stored in ethanol in the field, and frozen since being in the lab. Two genome sequence libraries were created using Illumina Nextera kits. One library had a target insert size of 500-640, and occupied a full run on the MiSeq genetic analyzer using 300-base paired-end reads, and the second library had a target insert size of 640-709 and occupied a full lane of a HiSeq 2500 in rapid run mode using 150-base paired-end reads.

The MiSeq run returned 16,279,946 paired-end reads. The program BBmerge version 4.0 (DOE: Joint Genome Institute; <https://jgi.doe.gov/data-and-tools/bbtools/bb-tools-user-guide/bbmerge-guide/>) was used to join the forward and reverse reads into a single long read. 7,050,488 of the read pairs (~43%) were joined, and the remaining reads were retained as paired-end reads or single reads for later analyses. The average size of merged reads was 542.6 bases. All reads were then trimmed using Trimmomatic (70) for minimum length, removing adapters, and performing basic quality filtering. All unmerged and unpaired reads were combined into a single fastq file.

The HiSeq run returned 150,979,291 paired-end reads. We removed adapters, trimmed for minimum length, and performed basic quality filtering using Trimmomatic (70). 130,607,604 pairs of reads (86.51%) passed filtering, plus another 9,199,536 (6.09%) of forward only reads passed filter, and 3,342,519 (2.21%) of reverse reads only passed filter. These two read sets (the MiSeq and the HiSeq Illumina datasets) composed the data for gene assembly.

Crows, *Corvus brachyrhynchus* and *Corvus cornix*, (Family Corvidae, from Joel McGlothlin, Virginia Tech) were the closest living relatives of *Pitohuis* that had a fully-annotated genome in the sodium channel gene regions. Crow sequences were used as reference sequences for BLAST searches of *Pitohui* sequences and for assisting with *Pitohui* Nav assembly. These sequences included the complete nuclear DNA sequence, with all exons, introns, and upstream and downstream UTRs.

To assemble the SCN4A gene from our *Pitohui* reads, we used the following pipeline, written as a bash shell script: First, we used BLATq version 1.0.2 (<https://github.com/calacademy->

research/BLATq) which uses BLAT (Kent WJ. 2002. BLAT—The BLAST-Like Alignment Tool. *Genome Research* 12:656–664. DOI: 10.1101/gr.229202. Kent WJ. 2012. BLAT—The BLAST-Like Alignment Tool. Version 35. Available at <https://users.soe.ucsc.edu/~kent/>.) to search both Illumina read sets for any sequences that aligned with the full genome sequences of one of the *Corvus Nav1.4* sodium channel genes. We then used the script `excerptByIDs` v. 1.0.2 (<https://github.com/calacademy-research/excerptByIDs>) to create a new fastq files consisting of only the Illumina reads with strong BLATq scores. These files were combined into a single set of all BLAT “hits” using the Unix “cat” command. We then used the assembler SPAdes 3.9.0 (71) to perform an initial *de novo* assembly of reads in the hit file. We improved upon this assembly by using the genome assembly program PRICE ver. 1.2 (72), which iteratively extends the assembly using the assembled contigs from SPAdes as well as all of the existing Illumina read data. See the supplementary materials on the assembly bash shell script and options and parameters.

The assembled contigs from PRICE were loaded into Geneious (ver. 8.0 through 11.0.2). Within Geneious, we used BLAST to identify which contigs contained the *Pitohui* sequences. We created a BLAST database consisting of all of the assembled PRICE contigs, and we used each of the *Corvus Nav1.4* exons to query the BLAST database of contigs using MegaBLAST. The top hits for each exon suggested which assembled contigs contained the Nav1.4 sequence, and typically several to all of the exons were found on the same contig. Assuming that the exon splice patterns were identical in crow and Pitohui, we aligned each of the crow Nav1.4 exon sequences to the top-hit Pitohui contig, and annotated the matching exon regions as the Pitohui SCN4A exons.

This assembly and annotation pipelines were repeated for primary voltage-gated sodium channels Nav1.5 alpha subunit (SCN5A) as well as the Navβ subunit (SCN2B).

### **Cloning of poison frog Navs**

Skeletal muscle was harvested from captive *Phylllobates terribilis* and *Dendrobates tinctorius* (Josh’s frogs, Owosso, MI, USA) following euthanasia in accordance with UCSF IACUC protocol AN136799. Total RNA and total DNA were extracted using TRIzol™ Reagent (Thermo Fisher Scientific). Total RNA was reverse transcribed into cDNA using SuperScript™ III First-Strand Synthesis System (Thermo Fisher Scientific). 5’ and 3’ end sequences of genes encoding for *P. terribilis* and *D. tinctorius* Nav1.4 were determined by DNA gel extraction and sequencing after rapid amplification of cDNA ends (RACE) using the SMARTer® RACE 5’/3’ Kit (Takara Bio, USA) and internal primers designed from *P. terribilis* and *D. tinctorius* Nav1.4 S6 segment sequences (24). From these 5’ end and 3’ end sequences, new primers were designed from both 5’ and 3’ untranslated regions (UTR) of each gene, and were used to amplify full-length *P. terribilis* and *D.*

*tinctorius* Nav<sub>1.4</sub> genes by polymerase chain reaction (PCR) using Phusion® HF (New England Biolabs). PCR products were gel extracted and sequenced to determine the full-length *P. terribilis* and *D. tinctorius* Nav<sub>1.4</sub> gene sequences. Direct cloning of the full length PCR products of *P. terribilis* and *D. tinctorius* Nav<sub>1.4</sub> channel genes into pCDNA3.1 proved problematic resulting unstable constructs prone to deletion. The codon optimized genes were synthesized for expression in human epithelium kidney cells (HEK293) (GenScript, Piscataway, NJ, USA), but were also found to prone to recombination upon insertion into pCDNA3.1. Finally, the gene sequences were redesigned to differ as much as possible from the original genes, synthesized (GenScript, Piscataway, NJ, USA), and cloned into pCDNA3.1. This strategy yielded stable constructs.

## Molecular biology

For electrophysiology experiments, *Hs* Nav<sub>1.4</sub> (GenBank: NM\_000334.4), human Nav<sub>β1</sub> (GenBank: NM\_001037.5), *Pum* Nav<sub>1.4</sub>, *Pum* Nav<sub>β2</sub>, *Pum* Nav<sub>1.5</sub>, *Pt* Nav<sub>1.4</sub>, and *Dt* Nav<sub>1.4</sub> were subcloned into pCDNA3.1 and *Rn* Nav<sub>1.4</sub> (GenBank: Y17153.1) was subcloned into pZem228. All mutants were made using the QuikChange Site-Directed Mutagenesis Kit (Agilent) and validated by complete sequencing of the genes encoding for the proteins of interest.

## Patch clamp electrophysiology

Human embryonic kidney cells (HEK 293) were grown at 37 °C under 5% CO<sub>2</sub>, in a Dulbecco's modified Eagle's medium supplemented with 10% fetal bovine serum, 10% L-glutamine, and antibiotics (100 IU ml<sup>-1</sup> penicillin and 100 mg ml<sup>-1</sup> streptomycin). HEK293 cells were transfected (in 35-mm- diameter wells) using Lipofectamine 2000 (Invitrogen, Carlsbad, CA, USA) and plated onto coverslips coated with Matrigel (BD Biosciences, San Diego, CA, USA). Human and pitohui Nav<sub>s</sub> were co-expressed with enhanced green fluorescent protein (EGFP), and human Nav<sub>β1</sub> or *Pitohui* Nav<sub>β2</sub>. Poison frog Nav<sub>s</sub> were co-expressed with EGFP. Transfected cells were identified visually by EGFP expression. A total of 2 µg plasmid DNA (20% Nav<sub>α</sub>, 40% Nav<sub>β</sub>, 40% EGFP) was transfected, except for the poison frog Nav<sub>s</sub> for which a total of 3 µg plasmid DNA (70% Nav<sub>α</sub>, 15% EGFP, 15% SV40 T antigen) was used to increase current amplitude. Experiments studying *Rn* Nav<sub>1.4</sub> constructs were conducted using Chinese hamster ovary (CHO) cells cultured as described previously (54). Briefly, cells were grown in DMEM (GIBCO, Grand Island, NY) supplemented with 10% cosmic calf serum (HyClone, Logan, UT) and 100 U/mL penicillin-streptomycin (GIBCO). Cells were kept in a 5% CO<sub>2</sub> and 96% relative humidity incubator. CHO



cells were transfected (in 10 cm plate) using the calcium phosphate precipitation method and EGFP expression as a marker of transfection.

Na<sup>+</sup> currents were recorded by whole cell patch clamp (73) at room temperature (23 ± 2 °C) 48–72 h post-transfection. Data collection was performed using an Axopatch 200B amplifier (Molecular Devices) and pCLAMP 9 (Molecular Devices, Sunnyvale, CA, USA).

Pipettes were pulled from borosilicate glass capillaries (TW150F-3; World Precision Instruments, Sarasota, FL, USA) and polished with a microforge (MF-900; Narishige, Tokyo, Japan) to obtain 1.2–3.5 MΩ resistances. Sixty to eighty percent of the voltage error due to the series resistance was compensated. For experiments with HEK 293 cells, pipette solution contained the following, in millimolar: 120, Cs methane sulfonate; 8, NaCl; 10, EGTA; 2, Mg-ATP; and 20, Hepes (pH 7.4 with CsOH). Bath solution contained the following, in millimolar: 155, NaCl; 1, CaCl<sub>2</sub>; 1, MgCl<sub>2</sub>; 5, KCl; 10, Hepes; and 10, glucose (pH 7.4 with NaOH). For experiments with CHO cells, pipette solution contained the following, in millimolar: 125, CsCl; 40, NaF; 1, EDTA; and 20, Hepes (pH 7.4 with CsOH). Bath solution contained the following, in millimolar: 160, NaCl; 2, CaCl<sub>2</sub>; and 20, Hepes (pH 7.4 with NaOH).

For experiments with HEK 293 cells, voltage-dependent activation was assessed by stimulating the cells with a multistep depolarization protocol from -90 to +50 mV using 5 mV increments, a -100 mV holding potential, and a sweep-to-sweep interval duration of 2 s. Voltage-dependent steady state inactivation was assessed by stimulating the cells with a 500-ms pre-pulse depolarization from -110 to 0 mV in 5 mV steps, followed by a 20-ms step to 0 mV, and repolarization to the holding potential, -100mV; sweep-to-sweep interval duration was 4 s. To examine BTX effects, cells were stimulated upon BTX exposure by applying at least 120 step pulses from -120 to 0 mV at 2 Hz frequency in order to facilitate BTX access into the channel pore as BTX is known to preferentially interact with the open state of Na<sub>v</sub>s (74). For experiments with CHO cells, voltage-dependent activation was assessed by stimulating the cells with a multistep depolarization protocol from -120 to +50 mV using 5 mV increments and a -120 mV holding potential. Voltage-dependent steady state inactivation was assessed by stimulating the cells with a 150-ms pre-pulse depolarization from -140 to 0 mV in 5 mV steps, followed by a 50 ms step to 0 mV, and repolarization to the holding potential, -120mV. Equilibration of BTX was accomplished with persistent activation of channels by applying a 24 ms step depolarization from -120 to 0 mV at a frequency of 2 Hz over the course of 8 min. Leak currents were subtracted using a P/4 protocol during data acquisition. Data analysis was performed using Clampfit 10.6 (Axon Instruments).



Activation curves were obtained by fitting the data with the following single or double Boltzmann equations:  $I = I_{max}/(1+\exp((V0.5-V_m)/k))$ , or  $I = (I_{max_1}/(1+\exp((V0.5_1-V_m)/k_1)))+(I_{max_2}/(1+\exp((V0.5_2-V_m)/k_2)))$ , where  $I_{max}$  is the maximal current after normalization to the driving force,  $V0.5$  is the half-activation potential,  $V_m$  is the membrane potential, and  $k$  is the slope factor. Inactivation curves were obtained by fitting the data with the following single Boltzmann equation:  $I = I_{max}/(1+\exp((V_m-V0.5)/k))$ , where  $I_{max}$  is the absolute value of the maximal current at the test pulse,  $V0.5$  is the half-inactivation potential,  $V_m$  is the membrane potential, and  $k$  is the slope factor. Current density was determined as the ratio between current amplitude (pA) and the membrane capacitance (pF).

## Two-electrode voltage clamp electrophysiology

Two-electrode voltage-clamp recordings were performed on defolliculated stage V–VI *Xenopus laevis* oocytes harvested under UCSF-IACUC protocol AN178461 1–2 days after microinjection with mRNA. Linearized *Pitohui* (*Pk*), *P. terribilis* (*Pt*), or *D. tinctorius* (*Dt*)  $Na_v1.4$  cDNA was translated into capped mRNA using the mMESSAGE mMACHINE™ T7 Transcription Kit (Invitrogen). *Xenopus* oocytes were injected with 0.5–2 ng, 3–6 ng or 10–30 ng of *Pk*  $Na_v1.4$ , *Pt*  $Na_v1.4$  or *Dt*  $Na_v1.4$  mRNA, respectively. Two-electrode voltage clamp experiments were performed 1–2 days post-injection. Data were acquired using a GeneClamp 500B amplifier (MDS Analytical Technologies) controlled by pClamp software (Molecular Devices), and digitized at 1 kHz using Digidata 1332A digitizer (MDS Analytical Technologies).

Oocytes were impaled with borosilicate recording microelectrodes (0.3–3.0 MΩ resistance) backfilled with 3 M KCl. Sodium currents were recorded using a bath solution containing the following, in millimolar: 96, NaCl; 1,  $CaCl_2$ ; 1,  $MgCl_2$ ; 2, KCl; and 5, HEPES (pH 7.5 with NaOH), supplemented with antibiotics (50  $\mu g\ ml^{-1}$  gentamycin, 100 IU  $ml^{-1}$  penicillin and 100  $\mu g\ ml^{-1}$  streptomycin) and 2.5 mM sodium pyruvate.

For studying the competition between tricaine and BTX, 0.5 mM tricaine was applied by continuous perfusion in the bath solution to assess channel block. BTX was applied from the intracellular side of the membrane by injecting oocytes with 50 nL of 2 mM BTX. Following BTX injection, oocytes were stimulated by applying 1000 step pulses of 60 ms each, from -120 to 0 mV at 2 Hz frequency in order to facilitate BTX access into the channel pore.

To determine STX and TTX dose-response curves, solutions containing test concentrations of each toxin were applied in series by perfusion to oocytes expressing *Pk*  $Na_v1.4$ , *Pt*  $Na_v1.4$ , or *Dt*  $Na_v1.4$ .  $IC_{50}$  values were calculated from the ratio of peak currents in the presence and absence

of toxin, based on the following equation:  $\frac{I_x}{I_0} = \frac{(I_{max} - I_{min})}{(1 + \frac{x}{IC_{50}})}$  where  $I_x$  is the current amplitude at the toxin concentration  $x$ ,  $I_0$  is the current amplitude in absence of toxin,  $I_{max}$  and  $I_{min}$  are the maximum and minimum peak current amplitudes, respectively, and  $IC_{50}$  is the half-maximal inhibitory concentration.

All toxin effects were assessed with 60-ms depolarization steps from -120 to 0 mV with a holding potential of -120 mV and a sweep-to-sweep duration of 10 s.

Recordings were conducted at room temperature ( $23 \pm 2$  °C). Leak currents were subtracted using a P/4 protocol during data acquisition. Data Analysis was performed using Clampfit 10.6 (Axon Instruments) and a custom software developed in the Igor environment (Wavemetrics).

### Toxin challenge experiments

Frogs for the toxin challenge experiments were obtained from the following sources: *Polypedates leucomystax*, *Phyllobates terribilis*, and *Dendrobates tinctorius* (Josh's frogs, Owosso, MI, USA); *Xenopus laevis* (Nasco); and *Mantella aurantiaca* (Indoor Ecosystems, Whitehouse, OH, USA). All experiments were performed in accordance with UCSF IACUC protocol AN136799.

Frogs were held at room temperature ( $23 \pm 2$  °C) and anesthetized with a 0.15% tricaine (MS-222) bath in prior to toxin injections. Once under anesthesia, as judged by immobility and lack of response to foot pinching, frogs were weighed in order to calculate the appropriate amount of toxin to be administered to at 20x the  $LD_{50}$  based on the values calculated for mice as follows: BTX: 2µg per kg, (39), STX: 10 µg per kg (75), and TTX: 12.5 µg per kg, (76). BTX, STX, and TTX, were delivered 40 ng, 200 ng, and 250 ng of toxin, respectively, per g of animal weight. The upper right hind leg was injected with either control, phosphate-buffered saline (PBS), or toxin containing solutions under an SMZ645 binocular microscope (Nikon) using a 30G PrecisionGlide™ needle (BD, Franklin Lakes, NJ, USA). Batrachotoxin (BTX), saxitoxin (STX) or tetrodotoxin (TTX) dissolved in PBS were injected at the appropriate concentration to deliver 20 times the  $LD_{50}$ . The total volume of injection was 100 µL in *X. laevis* and 10 µL in other frogs due to their smaller size. The choice of intramuscular injection was to avoid internal organ damage. Frogs were allowed to recover in a separate container and monitored constantly for signs of recovery, paralysis, or other adverse symptoms. For *X. laevis*, the recovery container was filled with deionized water and inclined in a way that the frogs could recover on the dry surface of the container base. Post-recovery activity was then assessed by the ability of the frogs to move from the dry to the water-containing surface as *X. laevis* are primarily aquatic animals. For all other frogs, post-recovery activity was assessed by monitoring the ability of the animals to put

themselves right-side up from a supine position in their recovery containers. The monitoring period was up to 24 hours post injection.

## References

1. A. H. Savitzky *et al.*, Sequestered defensive toxins in tetrapod vertebrates: principles, patterns, and prospects for future studies. *Chemoecology* **22**, 141-158 (2012).
2. J. C. Santos, R. D. Tarvin, L. A. O'Connell, in *Chemical Signals in Vertebrates 13*. (Springer International Publishing, Switzerland, 2016), vol. 13, pp. 305-337.
3. J. P. Dumbacher, B. M. Beehler, T. F. Spande, H. M. Garraffo, J. W. Daly, Homobatrachotoxin in the genus Pitohui: chemical defense in birds? *Science* **258**, 799-801 (1992).
4. J. P. Dumbacher, T. F. Spande, J. W. Daly, Batrachotoxin alkaloids from passerine birds: a second toxic bird genus (*Ifrita kowaldi*) from New Guinea. *Proc Natl Acad Sci U S A* **97**, 12970-12975 (2000).
5. J. W. Daly *et al.*, An uptake system for dietary alkaloids in poison frogs (Dendrobatidae). *Toxicon* **32**, 657-663 (1994).
6. J. W. Daly, H. M. Garraffo, T. F. Spande, C. Jaramillo, A. S. Rand, Dietary Source for Skin Alkaloids of Poison Frogs (Dendrobatidae). *Journal of Chemical Ecology* **20**, 943-955 (1994).
7. J. P. Dumbacher *et al.*, Melyrid beetles (Choresine): a putative source for the batrachotoxin alkaloids found in poison-dart frogs and toxic passerine birds. *Proc Natl Acad Sci U S A* **101**, 15857-15860 (2004).
8. J. P. Dumbacher, G. K. Menon, J. W. Daly, Skin as a Toxin Storage Organ in the Endemic New Guinean Genus Pitohui. *Auk* **126**, 520-530 (2009).
9. W. A. Catterall, Activation of the action potential Na<sup>+</sup> ionophore by neurotoxins. An allosteric model. *J Biol Chem* **252**, 8669-8676 (1977).
10. B. I. Khodorov, Batrachotoxin as a tool to study voltage-sensitive sodium channels of excitable membranes. *Prog Biophys Mol Biol* **45**, 57-148 (1985).
11. M. M. Logan, T. Toma, R. Thomas-Tran, J. Du Bois, Asymmetric synthesis of batrachotoxin: Enantiomeric toxins show functional divergence against NaV. *Science* **354**, 865-869 (2016).
12. S. Y. Wang, G. K. Wang, Voltage-gated sodium channels as primary targets of diverse lipid-soluble neurotoxins. *Cell Signal* **15**, 151-159 (2003).
13. K. Arbuckle, R. C. Rodriguez de la Vega, N. R. Casewell, Coevolution takes the sting out of it: Evolutionary biology and mechanisms of toxin resistance in animals. *Toxicon* **140**, 118-131 (2017).
14. K. H. Almabruk, L. K. Dinh, B. Philmus, Self-Resistance of Natural Product Producers: Past, Present, and Future Focusing on Self-Resistant Protein Variants. *ACS Chem Biol* **13**, 1426-1437 (2018).
15. P. Hunter, Do not poison thyself Mechanisms to avoid self-toxicity could inspire novel compounds and pathways for synthetic biology and applications for agriculture. *Embo Rep* **19**, (2018).
16. R. D. Tarvin *et al.*, Interacting amino acid replacements allow poison frogs to evolve epibatidine resistance. *Science* **357**, 1261-1266 (2017).
17. V. M. Bricelj *et al.*, Sodium channel mutation leading to saxitoxin resistance in clams increases risk of PSP. *Nature* **434**, 763-767 (2005).
18. C. T. Hanifin, W. F. Gilly, Evolutionary history of a complex adaptation: Tetrodotoxin resistance in salamanders. *Evolution* **69**, 232-244 (2015).
19. M. C. Jost *et al.*, Toxin-resistant sodium channels: parallel adaptive evolution across a complete gene family. *Mol Biol Evol* **25**, 1016-1024 (2008).
20. S. Geffeney, E. D. Brodie, Jr., P. C. Ruben, E. D. Brodie, 3rd, Mechanisms of adaptation in a predator-prey arms race: TTX-resistant sodium channels. *Science* **297**, 1336-1339 (2002).

21. S. L. Geffeney, E. Fujimoto, E. D. Brodie, 3rd, E. D. Brodie, Jr., P. C. Ruben, Evolutionary diversification of TTX-resistant sodium channels in a predator-prey interaction. *Nature* **434**, 759-763 (2005).
22. J. W. McGlothlin *et al.*, Historical Contingency in a Multigene Family Facilitates Adaptive Evolution of Toxin Resistance. *Curr Biol* **26**, 1616-1621 (2016).
23. J. W. Daly, C. W. Myers, J. E. Warnick, E. X. Albuquerque, Levels of batrachotoxin and lack of sensitivity to its action in poison-dart frogs (Phyllobates). *Science* **208**, 1383-1385 (1980).
24. R. D. Tarvin, J. C. Santos, L. A. O'Connell, H. H. Zakon, D. C. Cannatella, Convergent Substitutions in a Sodium Channel Suggest Multiple Origins of Toxin Resistance in Poison Frogs. *Mol Biol Evol* **33**, 1068-1081 (2016).
25. S. Y. Wang, G. K. Wang, Single rat muscle Na(+) channel mutation confers batrachotoxin autoresistance found in poison-dart frog *Phyllobates terribilis*. *Proc Natl Acad Sci U S A* **114**, 10491-10496 (2017).
26. R. Marquez, V. Ramirez-Castaneda, A. Amezcuita, Does batrachotoxin autoresistance coevolve with toxicity in *Phyllobates* poison-dart frogs? *Evolution* **73**, 390-400 (2019).
27. E. X. Albuquerque, J. E. Warnick, F. M. Sansone, J. Daly, The pharmacology of batrachotoxin. V. A comparative study of membrane properties and the effect of batrachotoxin on sartorius muscles of the frogs *Phyllobates aurotaenia* and *Rana pipiens*. *J Pharmacol Exp Ther* **184**, 315-329 (1973).
28. C. R. Feldman *et al.*, Is there more than one way to skin a newt? Convergent toxin resistance in snakes is not due to a common genetic mechanism. *Heredity (Edinb)* **116**, 84-91 (2016).
29. M. T. J. Hague *et al.*, Large-effect mutations generate trade-off between predatory and locomotor ability during arms race coevolution with deadly prey. *Evol Lett* **2**, 406-416 (2018).
30. L. E. Llewellyn, P. M. Bell, E. G. Moczydlowski, Phylogenetic survey of soluble saxitoxin-binding activity in pursuit of the function and molecular evolution of saxiphilin, a relative of transferrin. *Proc Biol Sci* **264**, 891-902 (1997).
31. J. Mahar, G. L. Lukacs, Y. Li, S. Hall, E. Moczydlowski, Pharmacological and biochemical properties of saxiphilin, a soluble saxitoxin-binding protein from the bullfrog (*Rana catesbeiana*). *Toxicon* **29**, 53-71 (1991).
32. G. K. Menon, J. P. Dumbacher, A 'toxin mantle' as defensive barrier in a tropical bird: evolutionary exploitation of the basic permeability barrier forming organelles. *Exp Dermatol* **23**, 288-290 (2014).
33. W. A. Catterall, M. J. Lenaeus, T. M. Gamal El-Din, Structure and Pharmacology of Voltage-Gated Sodium and Calcium Channels. *Annu Rev Pharmacol Toxicol* **60**, 133-154 (2020).
34. Y. Du, D. P. Garden, L. Wang, B. S. Zhorov, K. Dong, Identification of new batrachotoxin-sensing residues in segment IIIS6 of the sodium channel. *J Biol Chem* **286**, 13151-13160 (2011).
35. J. D. Calhoun, L. L. Isom, The role of non-pore-forming beta subunits in physiology and pathophysiology of voltage-gated sodium channels. *Handb Exp Pharmacol* **221**, 51-89 (2014).
36. J. Gilchrist, B. M. Olivera, F. Bosmans, Animal toxins influence voltage-gated sodium channel function. *Handb Exp Pharmacol* **221**, 203-229 (2014).
37. M. M. Zhang *et al.*, Co-expression of Na(V)beta subunits alters the kinetics of inhibition of voltage-gated sodium channels by pore-blocking mu-conotoxins. *Br J Pharmacol* **168**, 1597-1610 (2013).
38. S. Das, J. Gilchrist, F. Bosmans, F. Van Petegem, Binary architecture of the Nav1.2-beta2 signaling complex. *eLife* **5**, (2016).

39. E. X. Albuquerque, J. W. Daly, B. Witkop, Batrachotoxin: chemistry and pharmacology. *Science* **172**, 995-1002 (1971).
40. C. W. Myers, J. W. Daly, B. Malkin, A dangerously toxic new frog (*Pyllobates*) used by Emberà Indians of Western Colombia, with discussion of blowgun fabrication and dart poisoning. *Bulletin of the American Museum of Natural History* **161**, 309-365 (1978).
41. G. K. Wang, C. Quan, S. Wang, A common local anesthetic receptor for benzocaine and etidocaine in voltage-gated  $\mu 1$   $\text{Na}^+$  channels. *Pflügers Arch* **435**, 293-302 (1998).
42. M. F. Sheets, H. A. Fozzard, D. A. Hanck, Important Role of Asparagines in Coupling the Pore and Voltage-Sensor Domain in Voltage-Gated Sodium Channels. *Biophys J* **109**, 2277-2286 (2015).
43. X. Pan *et al.*, Structure of the human voltage-gated sodium channel Nav1.4 in complex with beta1. *Science* **362**, (2018).
44. J. W. Daly, T. F. Spande, H. M. Garraffo, Alkaloids from amphibian skin: a tabulation of over eight-hundred compounds. *J Nat Prod* **68**, 1556-1575 (2005).
45. J. W. Daly *et al.*, Individual and geographic variation of skin alkaloids in three species of Madagascan poison frogs (*Mantella*). *J Chem Ecol* **34**, 252-279 (2008).
46. H. M. Garraffo *et al.*, Alkaloids in Madagascan frogs (*Mantella*): pumiliotoxins, indolizidines, quinolizidines, and pyrrolizidines. *J Nat Prod* **56**, 1016-1038 (1993).
47. A. P. Thottumkara, W. H. Parsons, J. Du Bois, Saxitoxin. *Angew Chem Int Ed Engl* **53**, 5760-5784 (2014).
48. L. M. Duran-Riveroll, A. D. Cembella, Guanidinium Toxins and Their Interactions with Voltage-Gated Sodium Ion Channels. *Mar Drugs* **15**, (2017).
49. R. K. Finol-Urdaneta *et al.*, Batrachotoxin acts as a stent to hold open homotetrameric prokaryotic voltage-gated sodium channels. *J Gen Physiol* **151**, 186-199 (2019).
50. G. K. Wang, S. Y. Wang, Inactivation of batrachotoxin-modified  $\text{Na}^+$  channels in GH3 cells. Characterization and pharmacological modification. *J Gen Physiol* **99**, 1-20 (1992).
51. G. K. Wang, W. M. Mok, S. Y. Wang, Charged tetracaine as an inactivation enhancer in batrachotoxin-modified  $\text{Na}^+$  channels. *Biophys J* **67**, 1851-1860 (1994).
52. G. K. Wang, S. Y. Wang, Binding of benzocaine in batrachotoxin-modified  $\text{Na}^+$  channels. State-dependent interactions. *J Gen Physiol* **103**, 501-518 (1994).
53. R. Thomas-Tran, J. Du Bois, Mutant cycle analysis with modified saxitoxins reveals specific interactions critical to attaining high-affinity inhibition of hNav1.7. *Proc Natl Acad Sci U S A* **113**, 5856-5861 (2016).
54. B. M. Andresen, J. Du Bois, De novo synthesis of modified saxitoxins for sodium ion channel study. *J Am Chem Soc* **131**, 12524-12525 (2009).
55. M. Chahine, P. B. Bennett, A. L. George, Jr., R. Horn, Functional expression and properties of the human skeletal muscle sodium channel. *Pflügers Arch* **427**, 136-142 (1994).
56. V. L. Thomas, A. C. McReynolds, B. K. Shoichet, Structural bases for stability-function tradeoffs in antibiotic resistance. *J Mol Biol* **396**, 47-59 (2010).
57. X. Wang, G. Minasov, B. K. Shoichet, Evolution of an antibiotic resistance enzyme constrained by stability and activity trade-offs. *J Mol Biol* **320**, 85-95 (2002).
58. L. S. Bigman, Y. Levy, Proteins: molecules defined by their trade-offs. *Curr Opin Struct Biol* **60**, 50-56 (2020).
59. N. Tokuriki, F. Stricher, L. Serrano, D. S. Tawfik, How protein stability and new functions trade off. *PLoS Comput Biol* **4**, e1000002 (2008).
60. C. Chen *et al.*, Reduced sodium channel density, altered voltage dependence of inactivation, and increased susceptibility to seizures in mice lacking sodium channel beta 2-subunits. *Proc Natl Acad Sci U S A* **99**, 17072-17077 (2002).
61. G. Loussouarn *et al.*, Physiological and Pathophysiological Insights of Nav1.4 and Nav1.5 Comparison. *Frontiers in pharmacology* **6**, 314 (2015).



62. C. H. Lee, D. K. Jones, C. Ahern, M. F. Sarhan, P. C. Ruben, Biophysical costs associated with tetrodotoxin resistance in the sodium channel pore of the garter snake, *Thamnophis sirtalis*. *J Comp Physiol A Neuroethol Sens Neural Behav Physiol* **197**, 33-43 (2011).
63. M. Prinzmetal, H. Sommer, C. D. Leake, The pharmacological action of "mussel poison". *J Pharmacol Exp Ther* **46**, 63-73 (1932).
64. C. Y. Kao, F. A. Fuhrman, Differentiation of Actions of Tetrodotoxin and Saxitoxin. *Toxicon* **5**, 25-34 (1967).
65. T.-J. Yen, M. Lolicato, R. Thomas-Tran, J. Du Bois, D. L. Minor, Jr., Structure of the Saxiphilin:saxitoxin (STX) complex reveals a convergent molecular recognition strategy for paralytic toxins. *Sci Adv* **5**, (2019).
66. S. N. Caty *et al.*, Molecular physiology of chemical defenses in a poison frog. *J Exp Biol* **222**, (2019).
67. L. A. O'Connell *et al.*, Rapid toxin sequestration impacts poison frog physiology. <http://www.biorxiv.org/content/10.1101/2020.05.27.119081v1>, (2020).
68. M. Yotsu-Yamashita *et al.*, Purification, characterization, and cDNA cloning of a novel soluble saxitoxin and tetrodotoxin binding protein from plasma of the puffer fish, *Fugu pardalis*. *Eur J Biochem* **268**, 5937-5946 (2001).
69. M. Yotsu-Yamashita, H. Yamaki, N. Okoshi, N. Araki, Distribution of homologous proteins to puffer fish saxitoxin and tetrodotoxin binding protein in the plasma of puffer fish and among the tissues of *Fugu pardalis* examined by Western blot analysis. *Toxicon* **55**, 1119-1124 (2010).
70. A. M. Bolger, M. Lohse, B. Usadel, Trimmomatic: a flexible trimmer for Illumina sequence data. *Bioinformatics* **30**, 2114-2120 (2014).
71. A. Bankevich *et al.*, SPAdes: a new genome assembly algorithm and its applications to single-cell sequencing. *J Comput Biol* **19**, 455-477 (2012).
72. J. G. Ruby, P. Bellare, J. L. Derisi, PRICE: software for the targeted assembly of components of (Meta) genomic sequence data. *G3 (Bethesda)* **3**, 865-880 (2013).
73. O. P. Hamill, A. Marty, E. Neher, B. Sakmann, F. J. Sigworth, Improved patch-clamp techniques for high-resolution current recording from cells and cell-free membrane patches. *Pflügers Arch* **391**, 85-100 (1981).
74. J. Tanguy, J. Z. Yeh, BTX modification of Na channels in squid axons. I. State dependence of BTX action. *J Gen Physiol* **97**, 499-519 (1991).
75. G. S. Wiberg, N. R. Stephenson, Toxicologic studies on paralytic shellfish poison. *Toxicol Appl Pharmacol* **2**, 607-615 (1960).
76. J. Lago, L. P. Rodriguez, L. Blanco, J. M. Vieites, A. G. Cabado, Tetrodotoxin, an Extremely Potent Marine Neurotoxin: Distribution, Toxicity, Origin and Therapeutical Uses. *Mar Drugs* **13**, 6384-6406 (2015).
77. Z. Yan *et al.*, Structure of the Nav1.4-beta1 Complex from Electric Eel. *Cell* **170**, 470-482 e411 (2017).

**Table 1 Activation parameters**

| Channel     | Current density                                            | $V_{1/2-I}$  | $\Delta V_{1/2} \text{ BTX}$ | $k_{act-I}$ | $V_{1/2-II}$ | $k_{act-II}$         | n  |
|-------------|------------------------------------------------------------|--------------|------------------------------|-------------|--------------|----------------------|----|
| Bird        | <b><i>Pum Nav<sub>v</sub>1.4</i></b>                       | 119.5 ±11.8  | -23.4 ±1.0                   | 5.9 ±0.3    |              |                      | 20 |
|             | +BTX                                                       |              | -57.0 ±0.7                   | -33.6 ±1.2  | 3.8 ±0.6     | -26.0 ±1.7 5.9 ±0.8  | 9  |
|             | <b><i>Pum Nav<sub>v</sub>1.4 + PkNav<sub>v</sub>β2</i></b> | 86.5 ±12.8   | -24.9 ±1.3                   | 6.2 ±0.5    |              |                      | 15 |
|             | +BTX                                                       |              | -59.9 ±1.9                   | -35.0 ±2.3  | 3.5 ±0.5     | -28.0 ±1.4 5.7 ±0.6  | 7  |
|             | <b><i>Pum Nav<sub>v</sub>1.5</i></b>                       | 17.1 ±3.5    | -22.4 ±1.6                   | 8.6 ±0.3    |              |                      | 9  |
|             | +BTX                                                       |              | -59.8 ±0.8                   | -37.4 ±1.8  | 5.5 ±1.9     | -25.0 ±2.3 11.3 ±0.7 | 8  |
|             | <b><i>Pum Nav<sub>v</sub>1.4 N432T (DI)</i></b>            | 107.5 ±26.9  | -20.2 ±1.9                   | 6.7 ±0.5    |              |                      | 7  |
|             | +BTX                                                       |              | -51.0 ±0.9                   | -30.8 ±2.1  | 4.4 ±0.4     | -9.9 ±6.1 7.4 ±1.4   | 10 |
|             | <b><i>Pum Nav<sub>v</sub>1.4 N830T (DII)</i></b>           | 8.1 ±1.5     | -22.4 ±1.0                   | 9.2 ±0.5    |              |                      | 16 |
|             | +BTX                                                       |              | -54.0 ±1.7                   | -31.6 ±2.0  | 7.6 ±1.0     | -22.9 ±1.8 5.2 ±0.9  | 9  |
|             | <b><i>Pum Nav<sub>v</sub>1.4 N1306T (DIII)</i></b>         | 103.7 ±29.4  | -26.7 ±1.0                   | 6.4 ±0.3    |              |                      | 10 |
|             | +BTX                                                       |              | -63.6 ±1.0                   | -36.9 ±1.4  | 3.7 ±0.6     | -24.8 ±1.2 8.5 ±1.3  | 5  |
|             | <b><i>Pum Nav<sub>v</sub>1.4 N1609T (DIV)</i></b>          | 24.6 ±10.8   | -2.9 ±1.1                    | 9.6 ±1.0    |              |                      | 9  |
|             | +BTX                                                       |              | -14.3 ±3.0                   | -11.4 ±3.2  | 9.7 ±2.1     | N/A N/A              | 5  |
| Human       | <b><i>Pum Nav<sub>v</sub>1.4 N1609A (DIV)</i></b>          | 28.9 ±4.6    | -3.8 ±1.3                    | 10.7 ±0.4   |              |                      | 21 |
|             | +BTX                                                       |              | -45.1 ±2.2                   | -41.3 ±2.6  | 9.1 ±0.8     | -9.6 ±2.0 8.6 ±1.1   | 14 |
|             | <b><i>Hs Nav<sub>v</sub>1.4</i></b>                        | 70.9 ±13.8   | -13.3 ±1.6                   | 6.1 ±0.4    |              |                      | 13 |
|             | +BTX                                                       |              | -49.2 ±0.9                   | -35.9 ±1.8  | 5.0 ±0.4     | -19.0 ±1.9 5.2 ±0.5  | 9  |
| Rat         | <b><i>Hs Nav<sub>v</sub>1.4 N1591T (DIV)</i></b>           | 31.7 ±13.4   | 3.6 ±2.2                     | 10.9 ±1.1   |              |                      | 4  |
|             | +BTX                                                       |              | -10.6 ±5.0                   | -14.2 ±5.5  | 9.7 ±0.6     | N/A N/A              | 6  |
|             | <b><i>Rn Nav<sub>v</sub>1.4</i></b>                        | 445.0 ±125.1 | -23.1 ±0.3                   | 7.3 ±0.3    |              |                      | 4  |
|             | +BTX                                                       |              | -68.7 ±0.2                   | -45.6 ±0.4  | 4.0 ±0.1     |                      | 4  |
| Poison frog | <b><i>Rn Nav<sub>v</sub>1.4 N1584T (DIV)</i></b>           | 43.2 ±40.1   | -5.1 ±0.5                    | 8.6 ±0.3    |              |                      | 6  |
|             | +BTX                                                       |              | -45.4 ±2.7                   | -40.3 ±2.8  | 9.6 ±1.1     | -17.0 ±1.2 13.0 ±0.9 | 6  |
|             | <b><i>Pt Nav<sub>v</sub>1.4</i></b>                        | 26.2 ±5.9    | -24.3 ±1.4                   | 7.6 ±0.3    |              |                      | 6  |
|             | Oocytes                                                    | 669.7 ±120.4 | -16.2 ±2.0                   | 4.3 ±0.6    |              |                      | 11 |
|             | +BTX                                                       |              | -54.3 ±1.6                   | -30.0 ±2.1  | 6.3 ±0.8     | -20.0 ±2.2 9.1 ±1.5  | 9  |
|             | +BTX oocytes                                               |              | -49.3 ±2.5                   | -33.1 ±3.2  | 4.8 ±0.7     |                      | 8  |
|             | <b><i>Pt Nav<sub>v</sub>1.4 (N1600T) (DIV)</i></b>         | 24.1 ±3.9    | -23.8 ±1.2                   | 9.0 ±0.3    |              |                      | 10 |
|             | +BTX                                                       |              | -54.6 ±2.2                   | -30.8 ±2.5  | 5.6 ±0.8     | -19.0 ±6.7 11.7 ±2.0 | 6  |
|             | <b><i>Dt Nav<sub>v</sub>1.4</i></b>                        | 11.1 ±1.8    | -17.1 ±1.6                   | 7.7 ±0.4    |              |                      | 13 |
|             | oocytes                                                    | 108.1 ±24.3  | -19.6 ±2.5                   | 5.1 ±0.6    |              |                      | 10 |
|             | +BTX                                                       |              | -55.0 ±1.2                   | -37.9 ±2.0  | 5.8 ±1.4     | -17.4 ±2.7 8.2 ±0.8  | 6  |
|             | +BTX oocytes                                               |              | -57.4 ±5.6                   | -37.8 ±6.1  | 5.2 ±0.7     |                      | 5  |
|             | <b><i>Dt Nav<sub>v</sub>1.4 (N1600T) (DIV)</i></b>         | 10.0 ±2.0    | -17.2 ±1.2                   | 10.7 ±0.9   |              |                      | 4  |
|             | +BTX                                                       |              | -55.1 ±1.4                   | -37.8 ±1.8  | 6.0 ±0.5     | -18.0 ±3.1 9.8 ±1.3  | 4  |



# Figure 1

Abderemane-Ali *et al.*

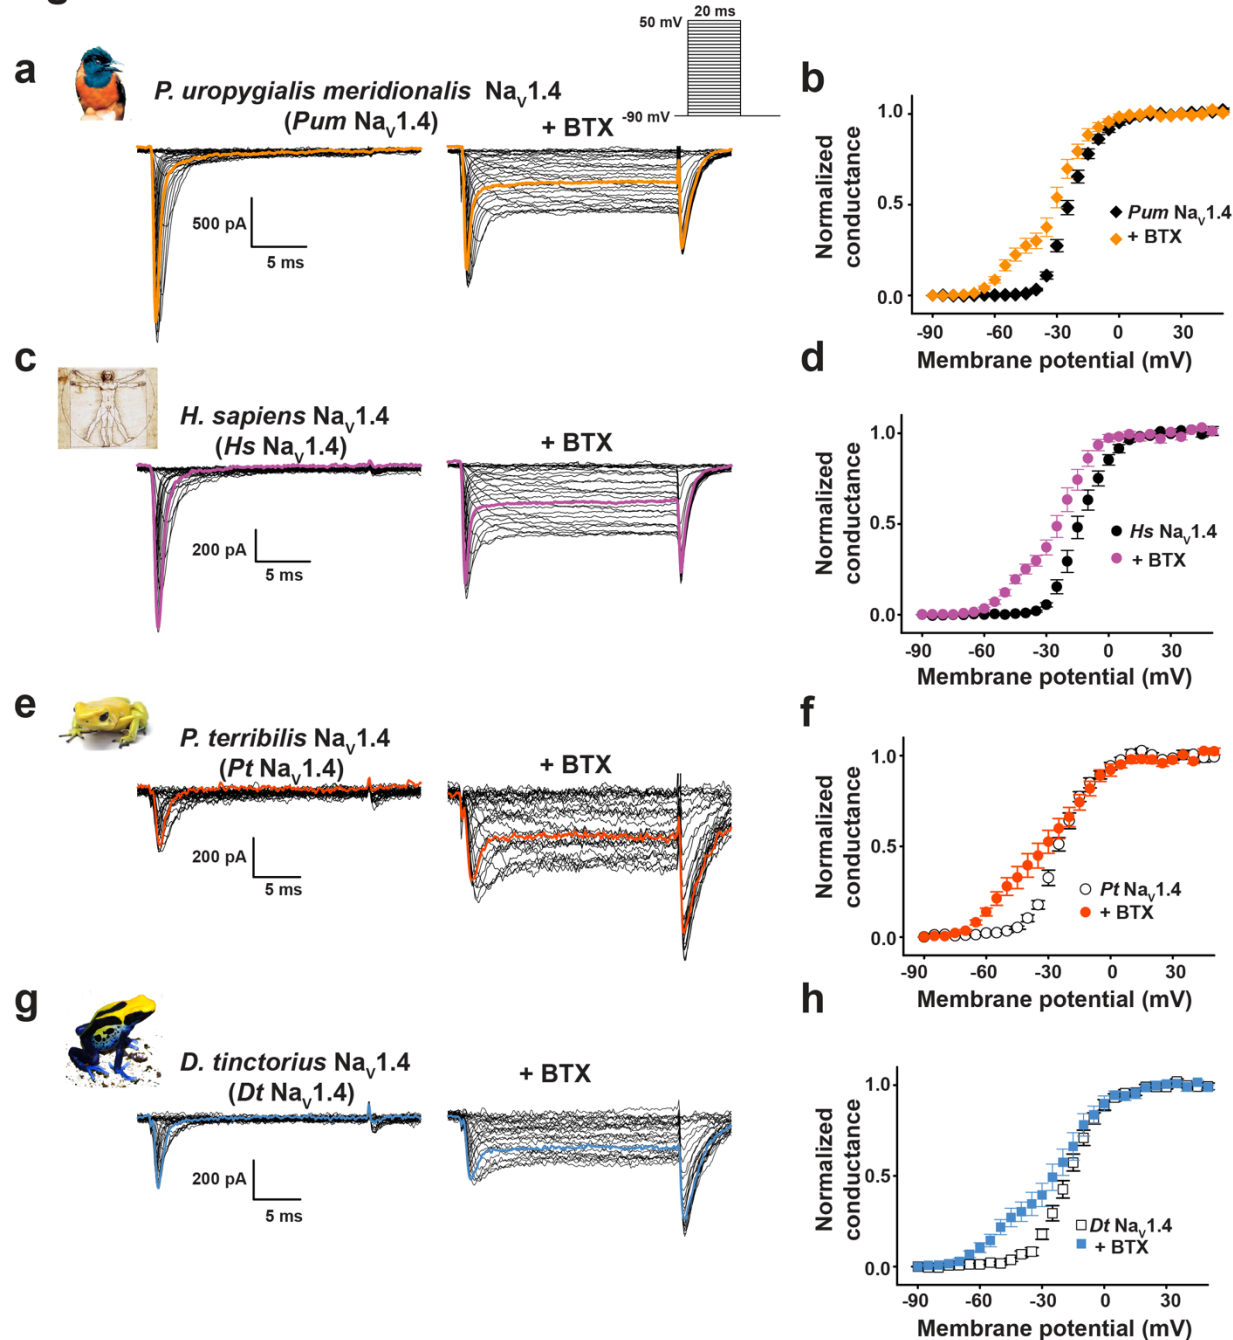

**Figure 1 Pitohui and Poison frog Nav<sub>v</sub>1.4 channels are BTX sensitive** Exemplar current recordings (a, c, e, and g) for: a, *Pitohui uropygialis meridionalis* Nav<sub>v</sub>1.4 (*Pum* Nav<sub>v</sub>1.4); c, Human Nav<sub>v</sub>1.4 (*Hs* Nav<sub>v</sub>1.4); e, *Phyllobates terribilis* Nav<sub>v</sub>1.4 (*Pt* Nav<sub>v</sub>1.4); and g, *Dendrobates tinctorius* Nav<sub>v</sub>1.4 (*Dt* Nav<sub>v</sub>1.4) expressed in HEK293 cells in absence (left) or presence of 10 μM BTX (right). Trace at 0 mV is highlighted in each panel. Currents were evoked with the shown multistep

depolarization protocol (inset panel 'a'). Conductance–voltage relationships (**b**, **d**, **f**, and **h**) in presence or absence of 10  $\mu$ M BTX for **b**, *Pum* Nav1.4 (black diamonds), +BTX (orange diamonds), **d**, *Hs* Nav1.4 (black circles), +BTX (purple circles) **f**, *Pt* Nav1.4 (white circles), +BTX (orange circles), and **h**, *Dt* Nav1.4 (white squares), +BTX (blue squares).

## Figure 2

Abderemane-Ali *et al.*

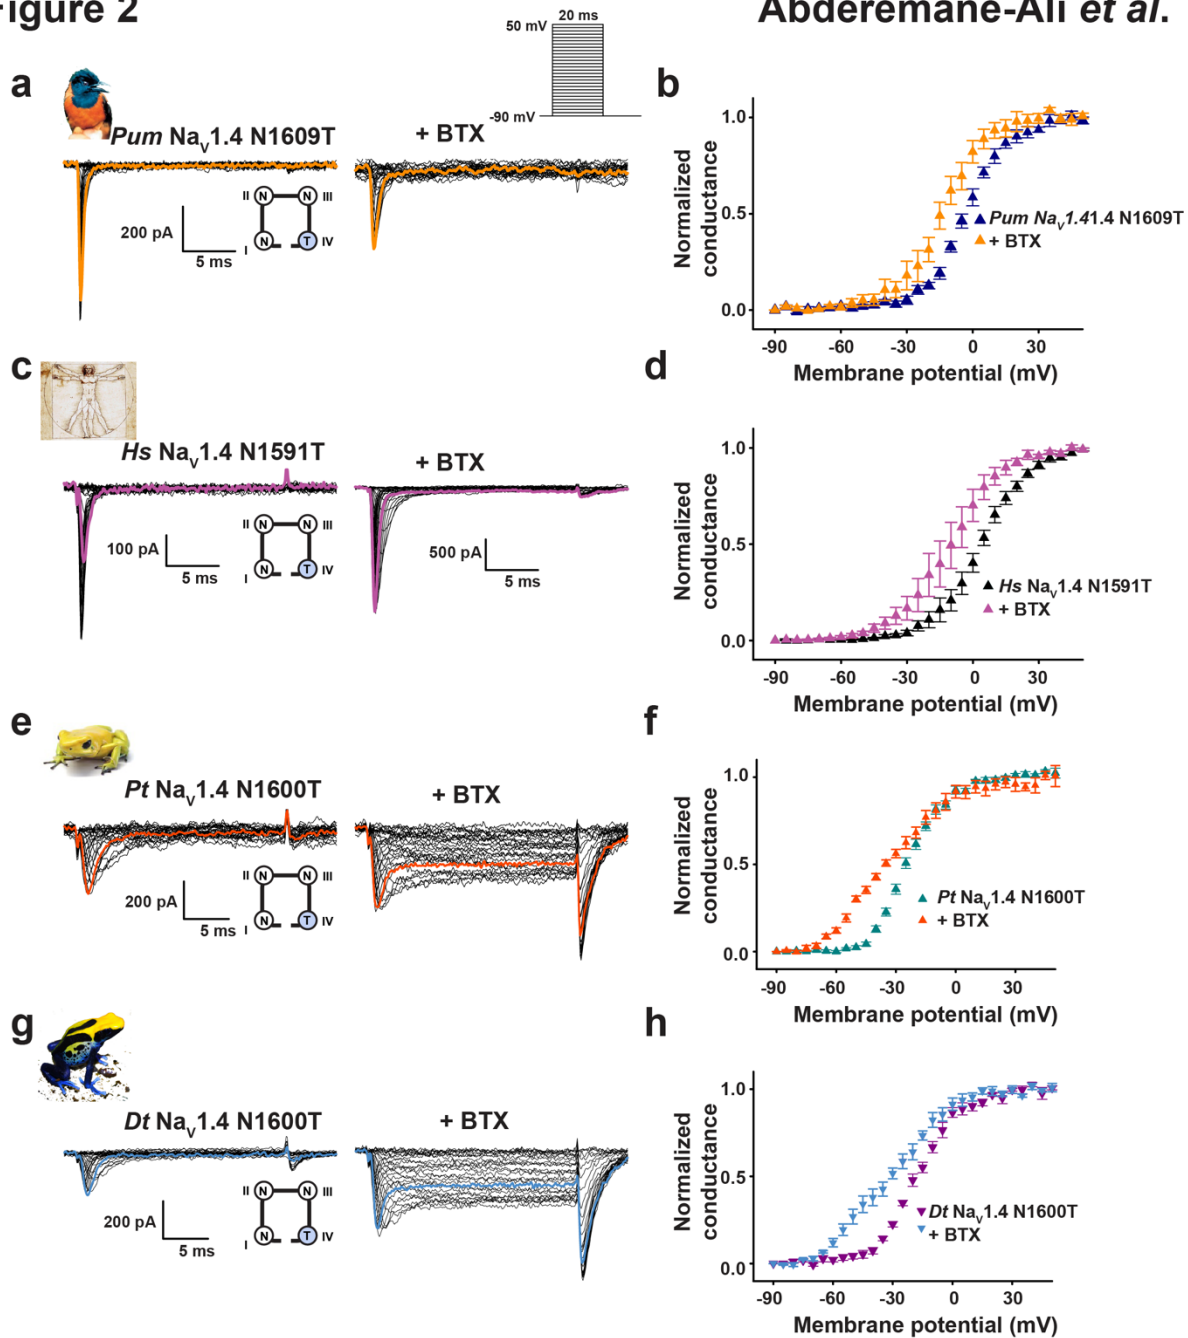

**Figure 2. DIVS6 N→T mutation reduces BTX sensitivity of *Pitohui* and human but not poison frog Nav1.4s** Exemplar current recordings (**a**, **c**, **e**, and **g**) for: **a**, *Pum* Nav<sub>1.4</sub> N1609T; **c**, *Hs* Nav<sub>1.4</sub> N1591T; **e**, *Pt* Nav<sub>1.4</sub> N1600T ; and **g**, *Dt* Nav<sub>1.4</sub> N1600T expressed in HEK293 cells in absence (left) or presence of 10 μM BTX (right). Trace at 0 mV is highlighted in each panel. Currents were evoked with the shown multistep depolarization protocol (inset panel ‘a’). Cartoon shows a diagram of the identities of the S6 ‘Asn’ for each construct. Conductance-voltage

relationships (**b**, **d**, **f**, and **h**) for **b**, *Pum* Nav<sub>1.4</sub> N1609T, **d**, *Hs* Nav<sub>1.4</sub> N1591T **f**, *Pt* Nav<sub>1.4</sub> N1600T, and **h**, *Dt* Nav<sub>1.4</sub> N1600T in presence or absence of 10  $\mu$ M BTX.

## Figure 3

Abderemane-Ali *et al.*

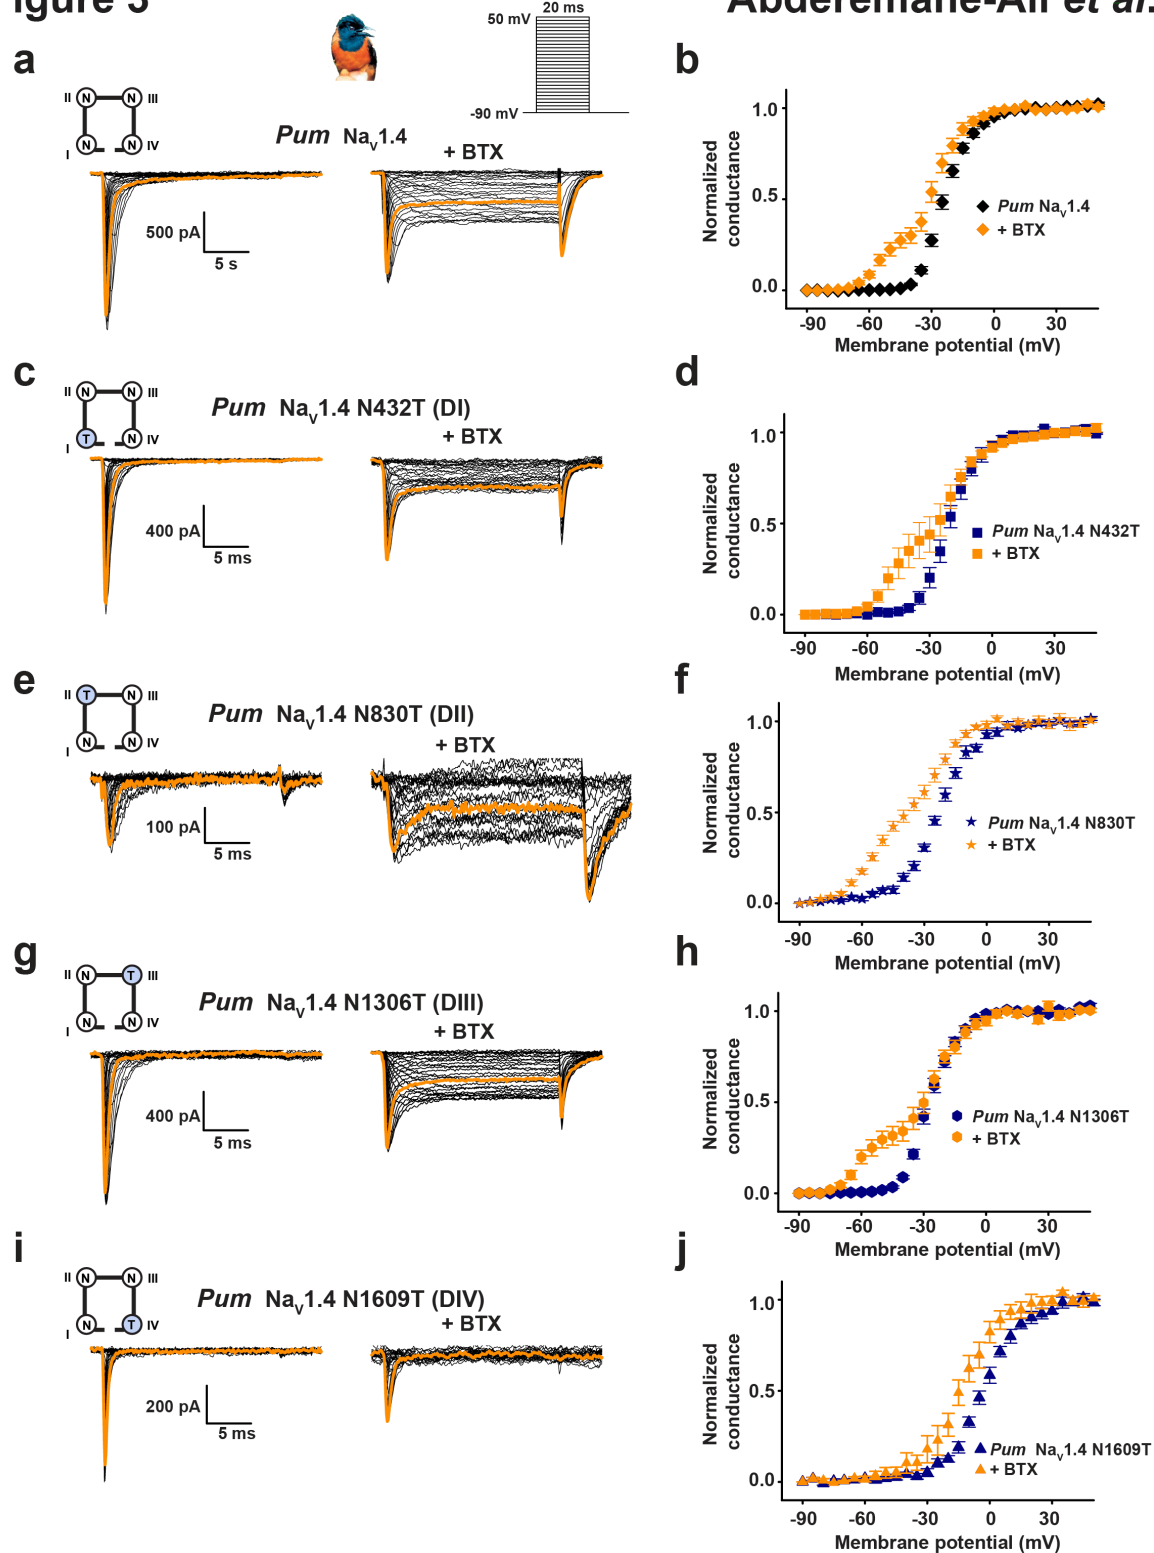

**Figure 3. Sodium channel modulation by BTX is associated with an asymmetry at the inner pore level.** Exemplar current recordings (**a**, **c**, **e**, **g**, and **i**) for: **a**, *Pum*  $\text{Na}_V1.4$ ; **c**, *Pum*  $\text{Na}_V1.4$

N432T; **e**, *Pum* Nav<sub>v</sub>1.4 N830T ; **g**, *Pum* Nav<sub>v</sub>1.4 N1306T, and **i**, *Pum* Nav<sub>v</sub>1.4 N1609T expressed in HEK293 cells in absence (left) of presence of 10  $\mu$ M BTX (right). Trace at 0 mV is highlighted in each panel. Currents were evoked with the shown multistep depolarization protocol (inset panel 'a'). Cartoon shows a diagram of the identities of the S6 'Asn' for each construct. Conductance-voltage relationships (**b**, **d**, **f**, **h**, and **j**) in presence or absence of 10  $\mu$ M BTX for **b**, *Pum* Nav<sub>v</sub>1.4 (black diamonds), +BTX (orange diamonds) **d**, *Pum* Nav<sub>v</sub>1.4 N432T (dark blue squares), +BTX (orange squares), **f**, *Pum* Nav<sub>v</sub>1.4 N830T (dark blue stars), +BTX (orange stars), and **h**, *Pum* Nav<sub>v</sub>1.4 N1306T (dark blue hexagons), +BTX (orange hexagons), and **j**, *Pum* Nav<sub>v</sub>1.4 N1609T (dark blue triangles), +BTX (orange triangles). Data in 'a' and 'b' are from Figure 1 **a** and **b**.

**Figure 4**

**Abderemane-Ali et al.**

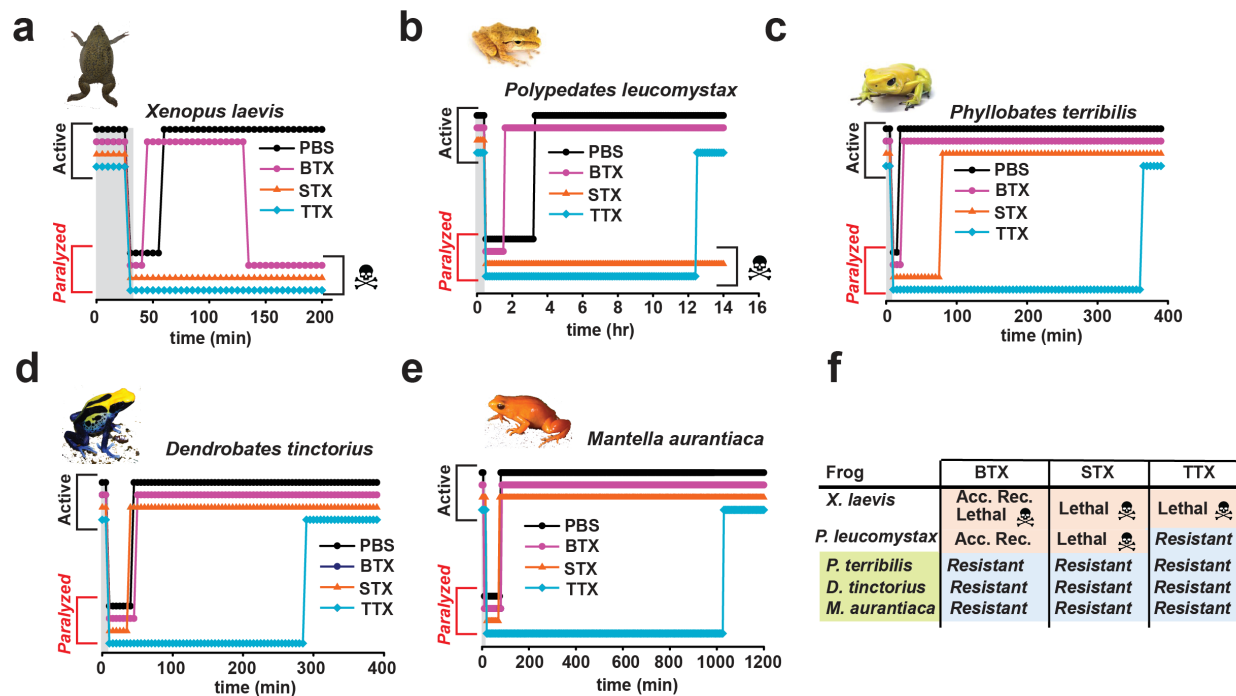

**Figure 4. Captive-raised poison frogs are resistant to BTX and STX** a-f, Challenge experiments for a, *Xenopus laevis*, b, *Polypedates leucomystax*, c, *Phylllobates terribilis*, d, *Dendrobates tinctorius*, and e, *Mantella aurantiaca* to PBS (black circles), BTX (magenta circles), STX (orange triangles), or TTX (cyan diamond) injection. Grey area shows period of anesthesia application. Active and paralyzed states of the frogs are indicated. f, Summary of the sensitivity of the indicated species to BTX, STX and TTX. 'Acc. Rec.' denotes accelerated recovery from anesthesia. 'Resistant' denotes no toxin-induced death.

29 October 2020

# **List of Supplementary Materials for:**

## **Sodium channel toxin-resistance mutations do not govern batrachotoxin (BTX) autoresistance in poison birds and frogs**

Fayal Abderemane-Ali<sup>1</sup>, Nathan D. Rossen<sup>1</sup>, Megan E. Kobiela<sup>2</sup>, Robert A. Craig II<sup>3</sup>, Catherine E. Garrison<sup>3</sup>, Lauren A. O'Connell<sup>4</sup>, J. Du Bois<sup>3</sup>, John P. Dumbacher<sup>5, 6</sup>, and Daniel L. Minor, Jr.<sup>1, 7-10\*</sup>

### **Figs. S1-S11**

**Fig. S1 *Pitohui* and Poison frog Nav1.4 sequences.**

**Fig. S2 *Pitohui* Nav1.5 sequence.**

**Fig. S3 *Pitohui* Nav1.5 and Nav1.4:Navβ2 complexes are BTX sensitive.**

**Fig. S4 Structural context for poison frog Nav amino acid changes.**

**Fig. S5 Poison frog Nav1.4s expressed in *Xenopus* oocytes are BTX sensitive.**

**Fig. S6 Functional costs of DIV-S6 'Asn' mutation in *Rn* Nav1.4.**

**Fig. S7 Functional cost of DIV-S6 'Asn' mutation in *Pum* Nav1.4 and *Hs* Nav1.4.**

**Fig. S8 Functional cost of DIV-S6 N→T mutation in poison frog Nav1.4s.**

**Fig. S9 Functional studies of S6 Asn mutants support asymmetric properties of the channel pore.**

**Fig. S10 BTX competes with anesthetic agent tricaine in Navs from poisonous species.**

**Fig. S11 Nav1.4s from poisonous animals are STX and TTX sensitive.**

### **Tables S1-S4**

**Table S1 Nav Inactivation parameters.**

**Table S2 Human→Poison frog Nav1.4 amino acid variants.**

**Table S3 Comparison of the functional effects of S6 mutations.**

**Table S4 Recovery time from anesthesia.**

**Gene assembly scripts.**



29 October 2020

# Figure S1

## Na<sub>v</sub>1.4

Abderemane-Ali et al.

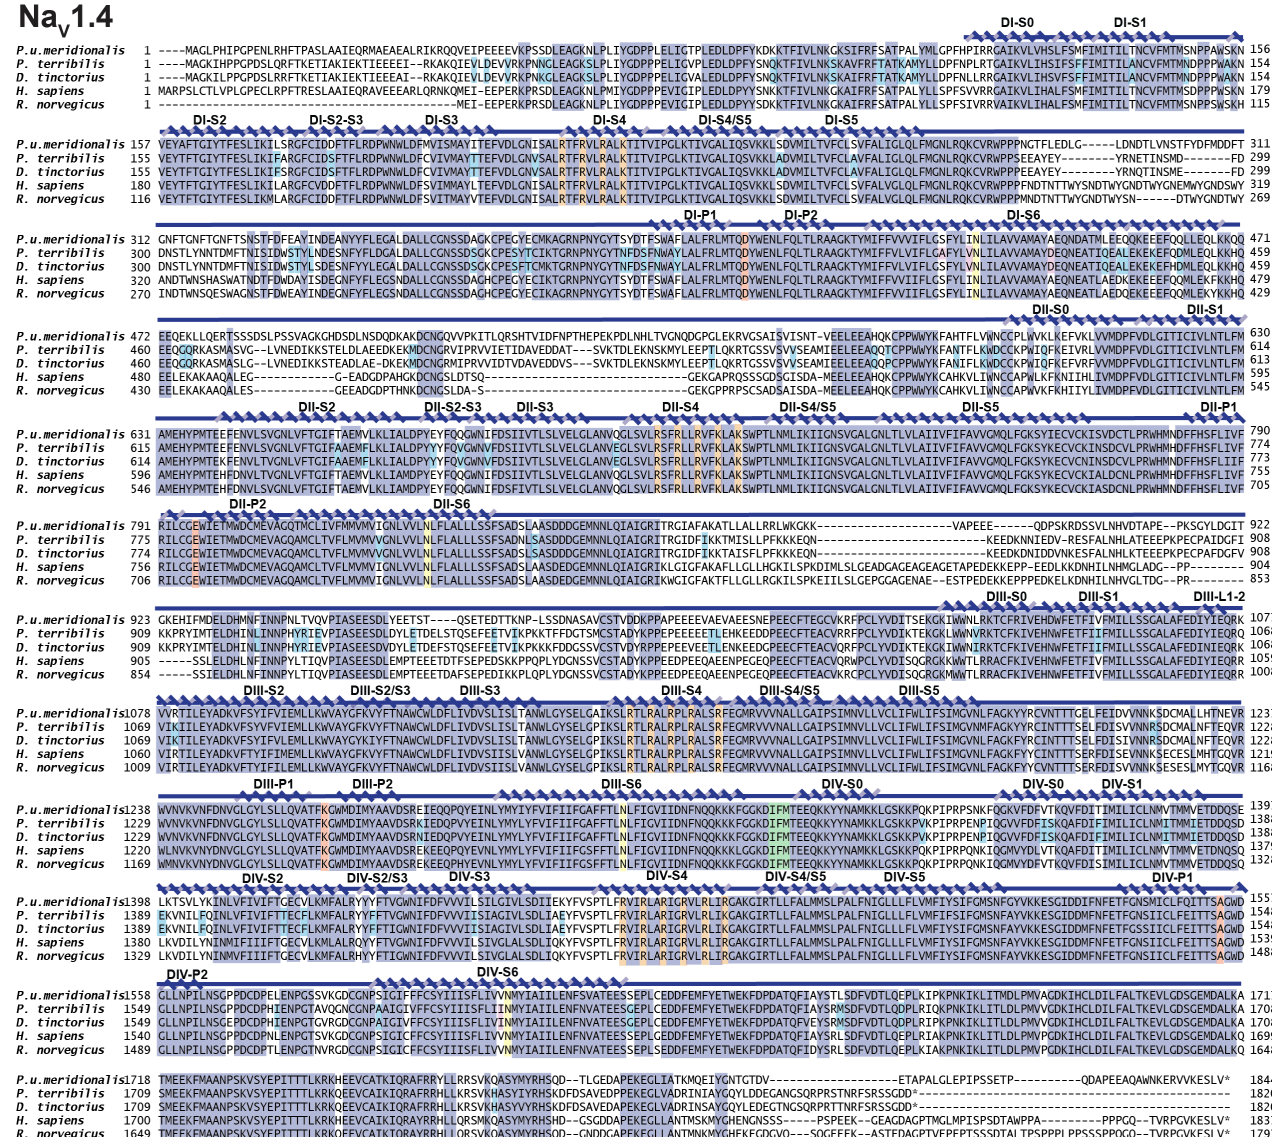

**Figure S1** *Pitohui* and Poison frog Nav<sub>1.4</sub> sequences. Sequence alignment of *Pitohui uropygialis meridionalis* Nav<sub>1.4</sub>, *Phyllobates terribilis* Nav<sub>1.4</sub>, *Dendrobates tinctorius* Nav<sub>1.4</sub>, *Homo sapiens* Nav<sub>1.4</sub> (NP\_000325.4), and *Rattus norvegicus* Nav<sub>1.4</sub> (NP\_037310.1). Key Nav<sub>1.4</sub> features are highlighted as follows: Selectivity filter 'DEKA' (red), 'IFM' peptide (green), conserved S6 Asn (yellow), S4 voltage sensor arginines (orange), poison frog variants (cyan) and sites highlighted by (24) (magenta) are indicated. Conserved residues are highlighted (dark blue). Secondary structure elements labeled using boundaries from (77).



29 October 2020

# Figure S3

Abderemane-Ali et al.

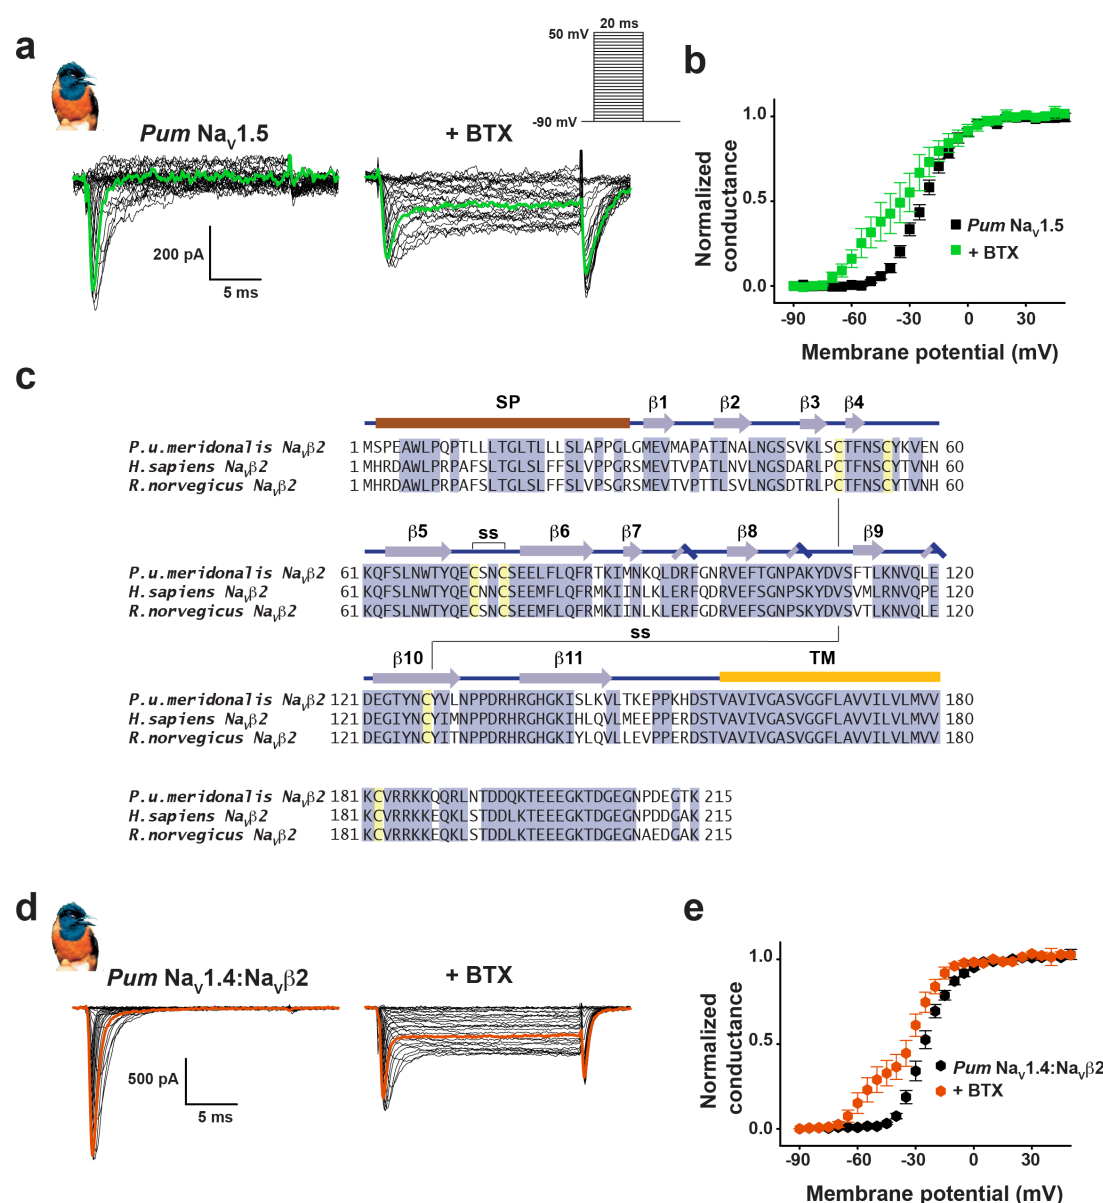

**Figure S3 *Pitohui* Na<sub>v</sub>1.5 and Na<sub>v</sub>1.4:Na<sub>v</sub>β2 complexes are BTX sensitive.** **a**, Exemplar current recordings for *Pum* Na<sub>v</sub>1.5 expressed in HEK293 cells in absence (left) or presence of 10 μM BTX (right). Trace at 0 mV is highlighted in each panel. Currents were evoked with the shown multistep depolarization protocol (inset). **b**, Conductance–voltage relationships in absence (black squares) or presence of 10 μM BTX (green squares). **c**, Sequence alignment of Na<sub>v</sub>β2 from *Pitohui uropygialis meridionalis*, *Homo sapiens* (NP\_004579.1) and *Rattus norvegicus* (NP\_037009.1). Signal peptide (SP), secondary structural elements from (38), conserved disulfide bond (ss), and transmembrane domain (TM) are indicated. **d**, Exemplar current recordings for *Pum* Na<sub>v</sub>1.4:Na<sub>v</sub>β2 expressed in HEK293 cells in absence (left) or presence of 10 μM BTX (right). Trace at 0 mV is highlighted in each panel. Currents were evoked with the shown

29 October 2020

multistep depolarization protocol (inset panel 'a'). **e**, Conductance–voltage relationships in absence (black hexagons) or presence of 10  $\mu$ M BTX (red hexagons).





29 October 2020

## Figure S5

Abderemane-Ali *et al.*

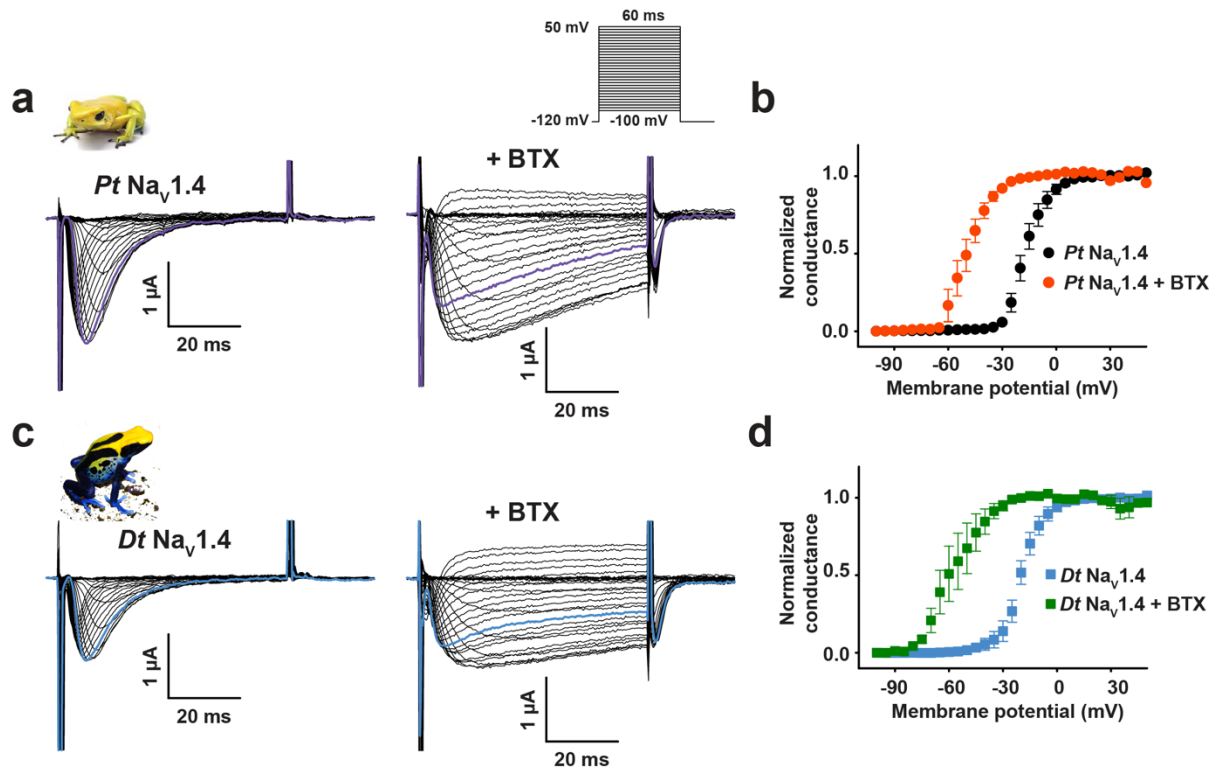

**Figure S5 Poison frog Nav1.4s expressed in *Xenopus* oocytes are BTX sensitive.** Exemplar current recordings (**a** and **c**) for: **a**, *Phylllobates terribilis* Nav<sub>v</sub>1.4 (*Pt* Nav<sub>v</sub>1.4); and **c**, *Dendrobates tinctorius* Nav<sub>v</sub>1.4 (*Dt* Nav<sub>v</sub>1.4) expressed in *Xenopus* oocytes in absence (left) or presence of 10 μM BTX (right). Trace at 0 mV is highlighted in each panel. Currents were evoked with the shown multistep depolarization protocol (inset panel 'a'). Conductance–voltage relationships (**b** and **d**) in presence or absence of 10 μM BTX for **b**, *Pt* Nav<sub>v</sub>1.4 (black circles), +BTX (orange circles) and **d**, *Dt* Nav<sub>v</sub>1.4 (light blue squares), +BTX (green squares).

29 October 2020

## Figure S6

Abderemane-Ali et al.

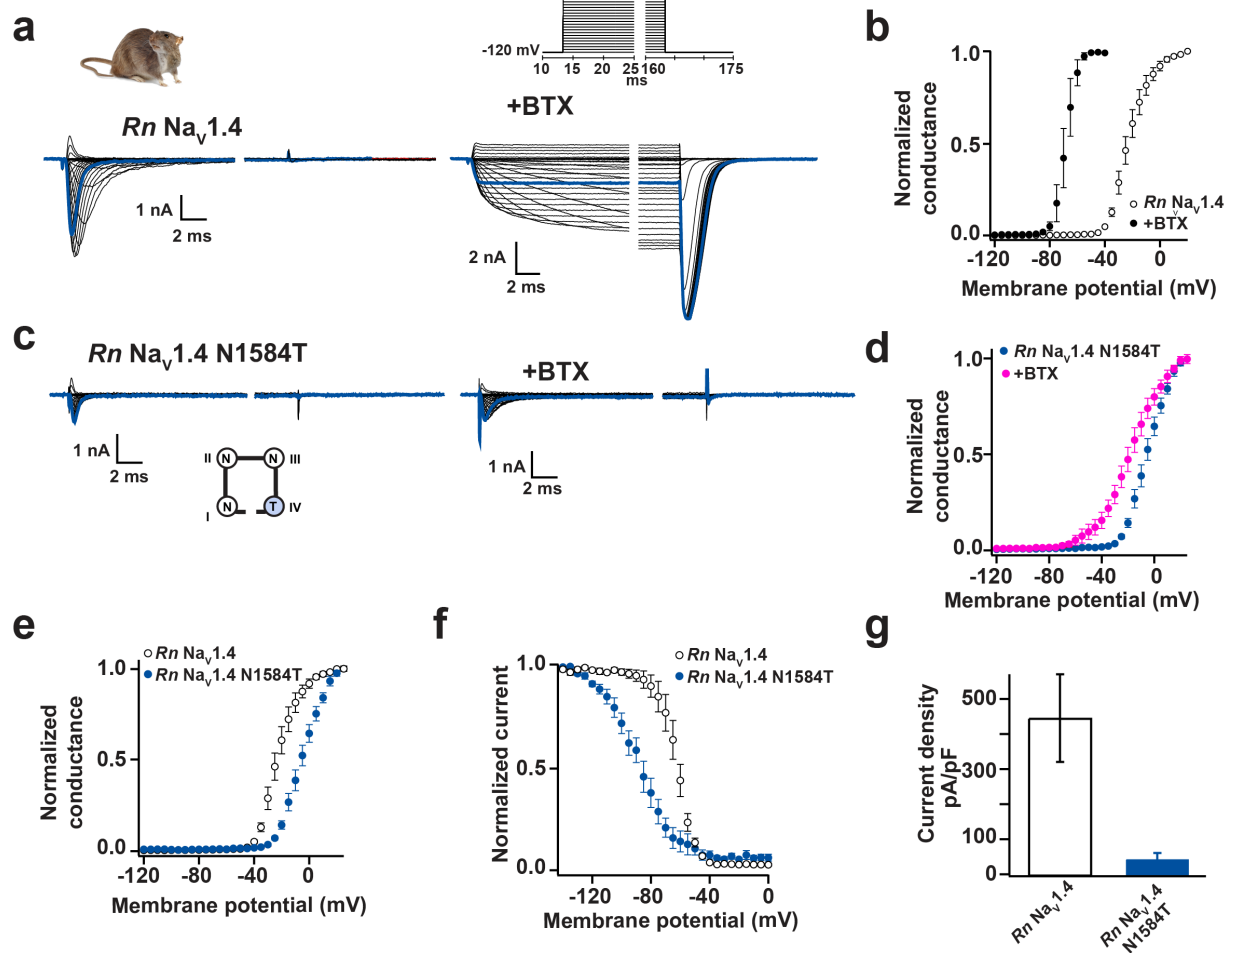

**Figure S6 Functional costs of DIV-S6 'Asn' mutation in *Rn Nav<sub>1.4</sub>*.** Exemplar current recordings (**a** and **c**) for: **a**, *Rn Nav<sub>1.4</sub>* and **c**, *Rn Nav<sub>1.4</sub> N1584T* expressed in CHO cells in absence (left) or presence of 10  $\mu$ M BTX (right). Trace at 0 mV is highlighted in each panel. Currents were evoked with the shown multistep depolarization protocol (inset panel 'a'). Conductance-voltage relationships (**b** and **d**) in presence or absence of 10  $\mu$ M BTX for **b**, *Rn Nav<sub>1.4</sub>* (open circles), +BTX (black circles) and **d**, *Rn Nav<sub>1.4</sub> N1584T* (blue circles), +BTX (magenta circles). **e**, Conductance-voltage relationships, **f**, Steady-state inactivation voltage dependencies for *Rn Nav<sub>1.4</sub>* (open circles) and *Rn Nav<sub>1.4</sub> N1584T* (blue circles). **g**, Current densities for *Rn Nav<sub>1.4</sub>* (white) and *Rn Nav<sub>1.4</sub> N1584T* (blue).



29 October 2020

# Figure S7

Abderemane-Ali et al.

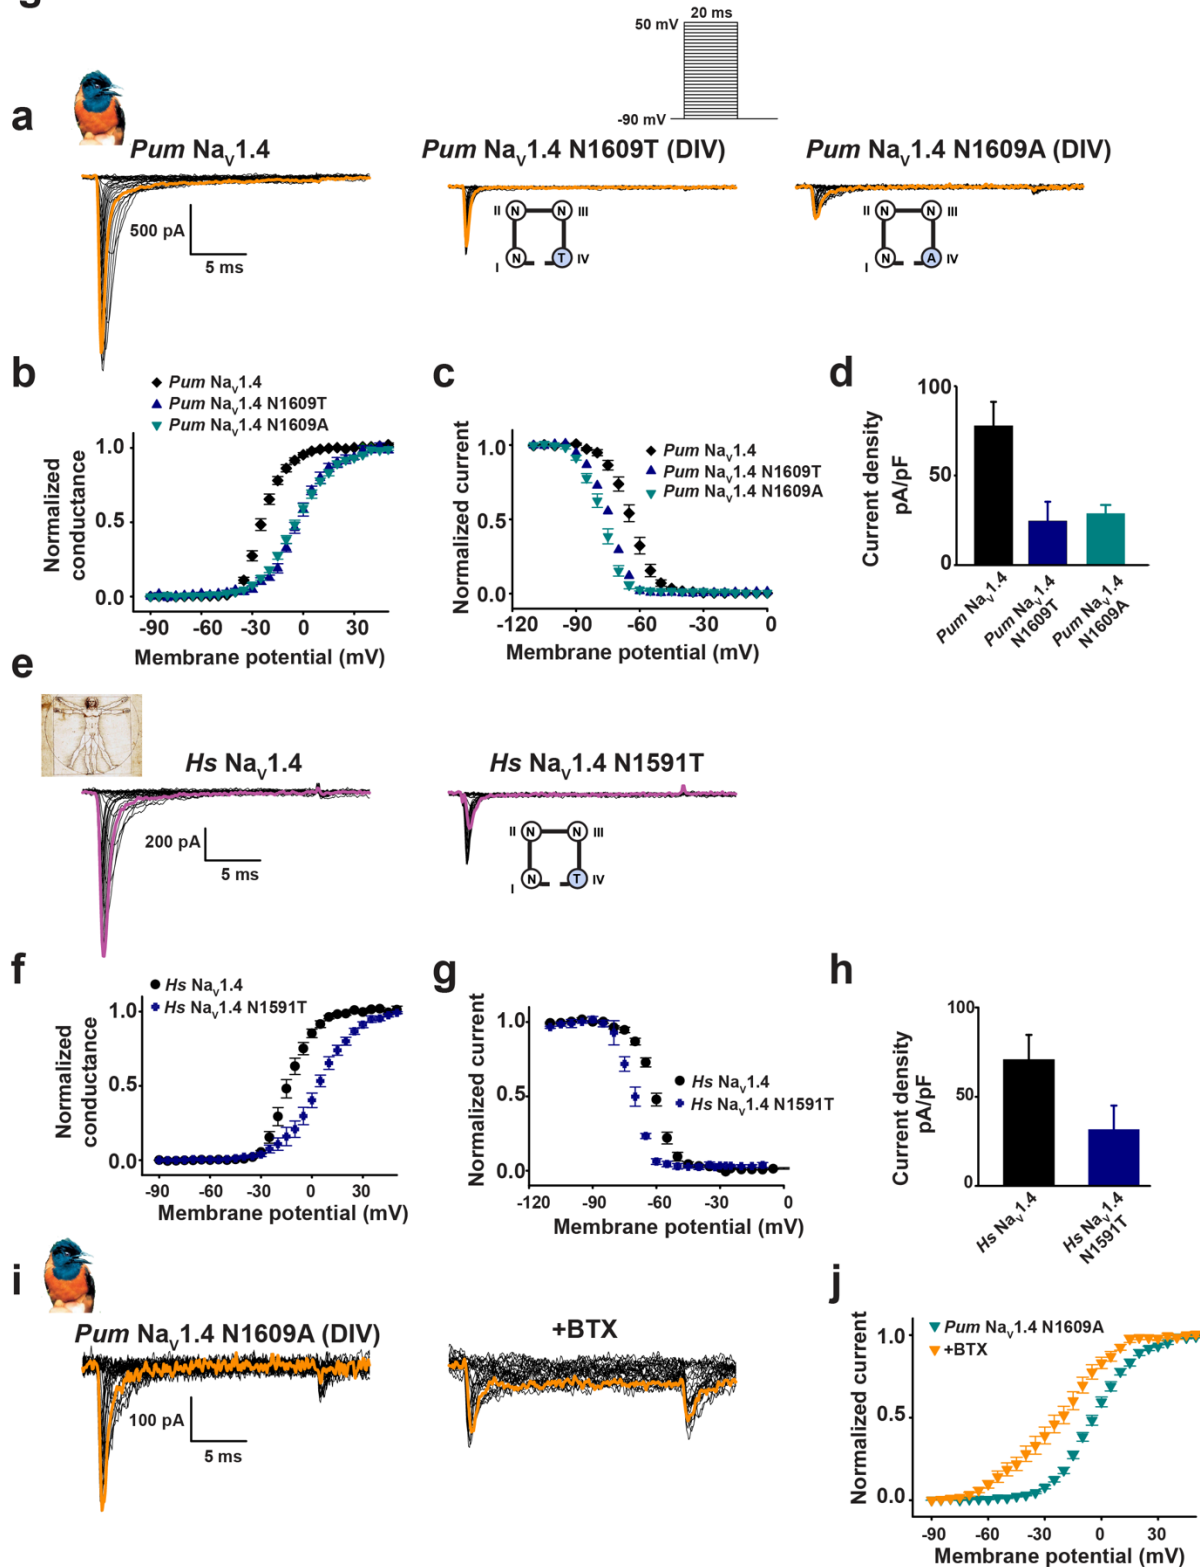

**Figure S7 Functional cost of DIV-S6 'Asn' mutation in *Pum Na<sub>v</sub>1.4* and *Hs Na<sub>v</sub>1.4*.** Exemplar current recordings (for: a, *Pum Na<sub>v</sub>1.4* (left), *Pum Na<sub>v</sub>1.4 N1609T* (middle), and *Pum Na<sub>v</sub>1.4*

29 October 2020

N1609A (right) expressed in HEK293 cells. Trace at 0 mV is highlighted and currents were evoked with the shown multistep depolarization protocol (inset). Cartoon shows a diagram of the identities of the S6 'Asn' for the 'Asn' mutants. **b**, Conductance-voltage relationships, **c**, steady-state inactivation voltage dependencies and **d**, current densities for *Pum* Na<sub>v</sub>1.4 (black diamonds), *Pum* Na<sub>v</sub>1.4 N1609T (blue triangles), and *Pum* Na<sub>v</sub>1.4 N1609A (teal inverted triangles). **e**, Exemplar current recordings for *Hs* Na<sub>v</sub>1.4 (left), *Hs* Na<sub>v</sub>1.4 N1591T (right), expressed in HEK293 cells. Trace at 0 mV is highlighted. Currents were evoked with the shown multistep depolarization protocol from 'a'. **f**, Conductance-voltage relationships, **g**, steady-state inactivation voltage dependencies and **h**, current densities *Hs* Na<sub>v</sub>1.4 (black circles) and *Hs* Na<sub>v</sub>1.4 N1591T (blue diamonds). **i**, Exemplar current recordings for *Pum* Na<sub>v</sub>1.4 N1609A (left) and in the presence of 10 μM BTX (right). **j**, Conductance-voltage relationships for *Pum* Na<sub>v</sub>1.4 N1609A (green inverted triangles) and in the presence of 10 μM BTX (orange inverted triangles).

29 October 2020

## Figure S8

Abderemane-Ali *et al.*

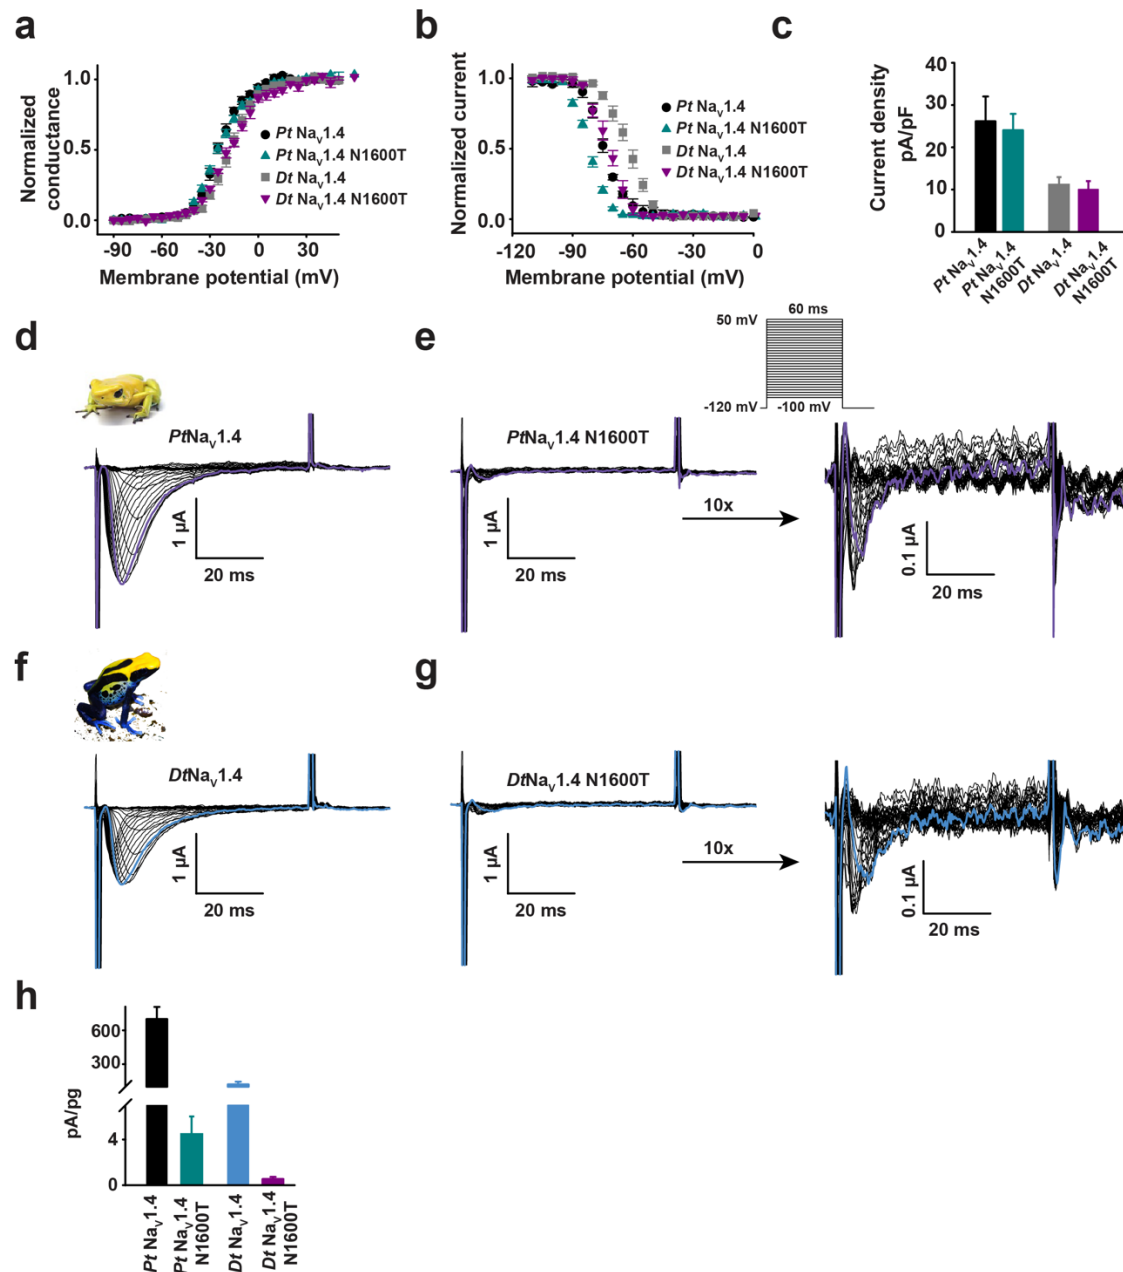

**Figure S8 Functional cost of DIV-S6 N→T mutation in poison frog Nav1.4s.** **a**, Conductance-voltage relationships, **b**, Steady-state inactivation voltage dependences, and **c**, current densities for Pt Nav<sub>v</sub>1.4, Pt Nav<sub>v</sub>1.4 N1600T, Dt Nav<sub>v</sub>1.4, and Dt Nav<sub>v</sub>1.4 N1600T expressed in HEK293 cells. Exemplar current recordings (**d**, **e**, **f**, and **g**) for: **d**, Pt Nav<sub>v</sub>1.4, **e**, Pt Nav<sub>v</sub>1.4 N1600T, **f**, Dt Nav<sub>v</sub>1.4, and **g**, Dt Nav<sub>v</sub>1.4 N1600T expressed in *Xenopus* oocytes. 10 times magnification of Pt Nav<sub>v</sub>1.4 N1600T and Dt Nav<sub>v</sub>1.4 N1600T traces are shown (**e** and **g**, right panels). Trace at 0 mV is highlighted in each panel. Currents were evoked with the shown multistep depolarization protocol (inset panel 'e'). **h**, Current amplitudes normalized to the amount of injected RNA for the indicated poison frog constructs.

29 October 2020

## Figure S9

Abderemane-Ali *et al.*

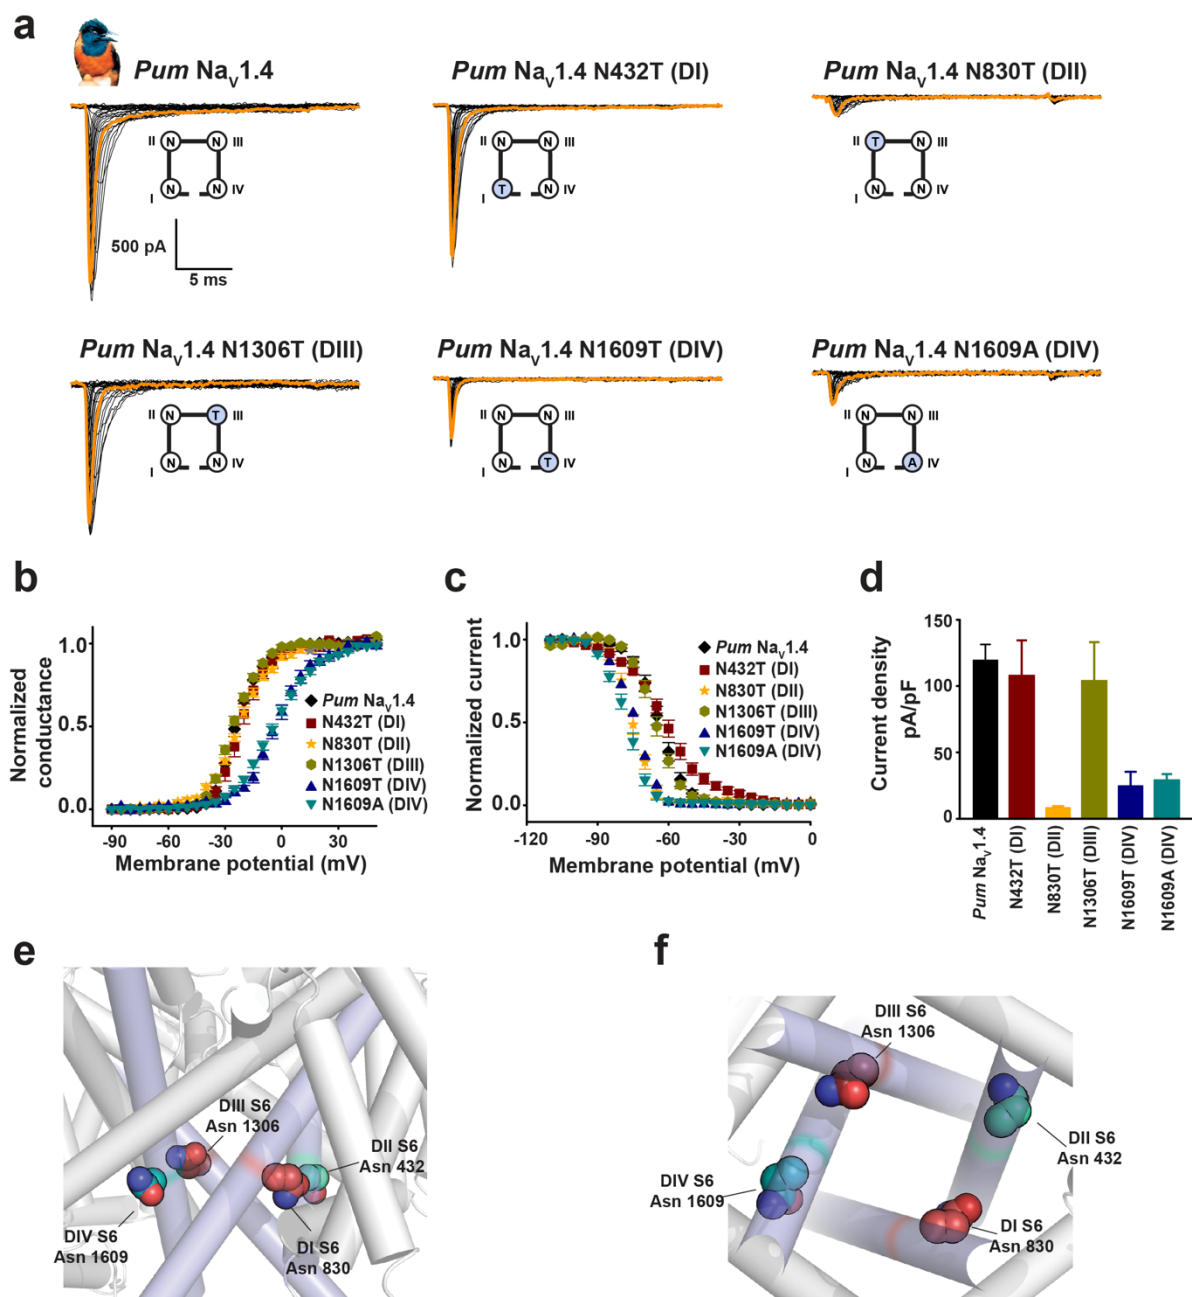

**Figure S9 Functional studies of S6 Asn mutants support asymmetric properties of the channel pore.** **a**, Exemplar current recordings, **b**, conductance-voltage relationships, **c**, steady-state inactivation voltage dependences, and **d**, current densities for *Pum Nav1.4*, *Pum Nav1.4* N432T, *Pum Nav1.4* N830T, *Pum Nav1.4* N1306T, *Pum Nav1.4* N1609T, and *Pum Nav1.4* N1609A expressed in HEK293 cells. Trace at 0 mV is highlighted in each panel. Cartoon shows a diagram of the identities of the S6 'Asn' for each construct. **e**, and **f**, Side 'e' and bottom 'f' views of the locations the S6 conserved asparagines. Residues are mapped on the structure of human *Nav1.4* (PDB:6ADF) (43) and are labeled using the *Pum Nav1.4* numbering.

29 October 2020

# Figure S10

Abderemane-Ali *et al.*

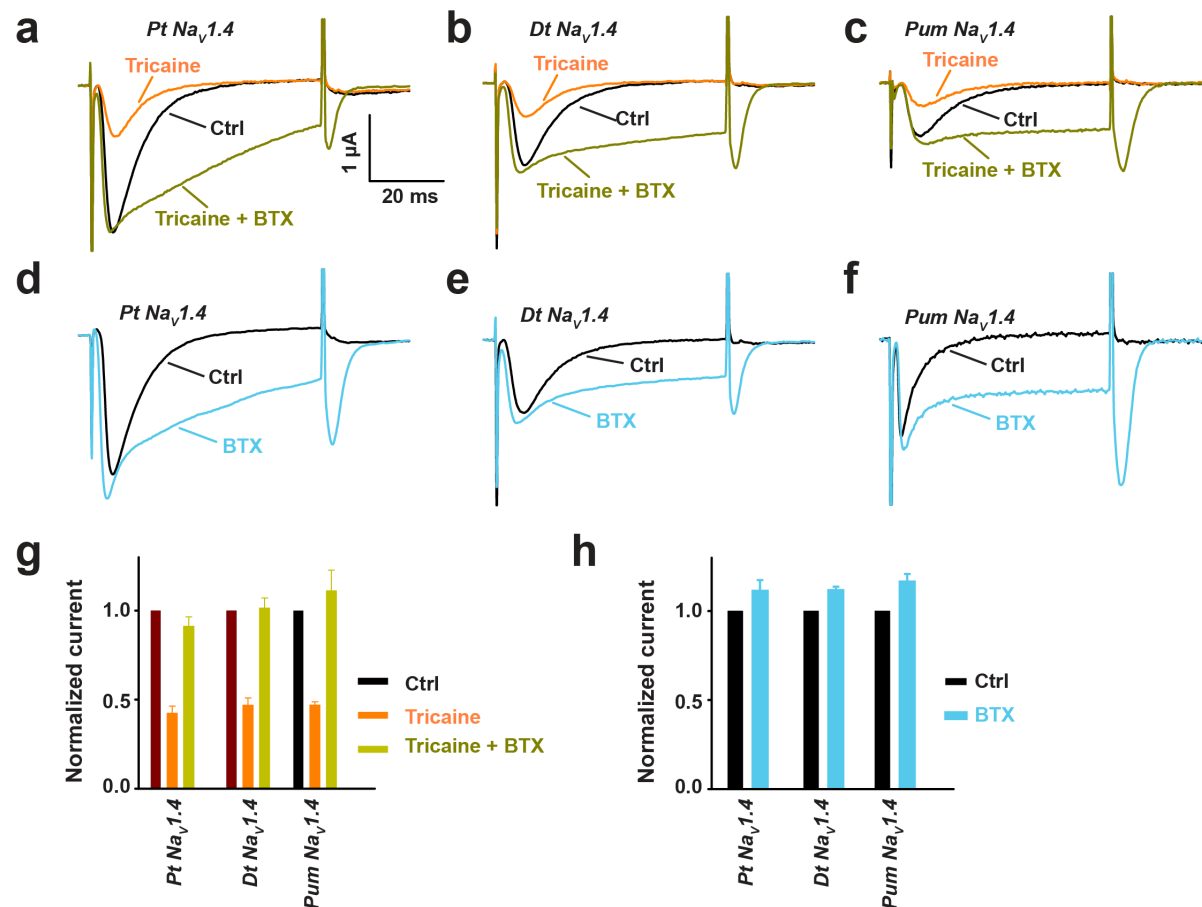

**Figure S10 BTX competes with anesthetic agent tricaine in Navs from poisonous species.** **a**, Exemplar recordings at 0 mV in control (black), after 0.5 mM tricaine application (orange) and after BTX injection (dark green) into the same *Xenopus* oocytes expressing Pt Nav1.4 (left), Dt Nav1.4 (middle) or Pum Nav1.4 (right). BTX injection was performed after tricaine block of sodium current and the recordings of the BTX effect were done while the oocyte was still exposed to tricaine. **b**, Exemplar recordings at 0 mV before (black) or after BTX injection (light blue) into the same *Xenopus* oocytes expressing Nav1.4 from the indicated poisonous species. **c** and **d**, Average peak current amplitudes normalized to the corresponding control peak current amplitude.

29 October 2020

## Figure S11

Abderemane-Ali *et al.*

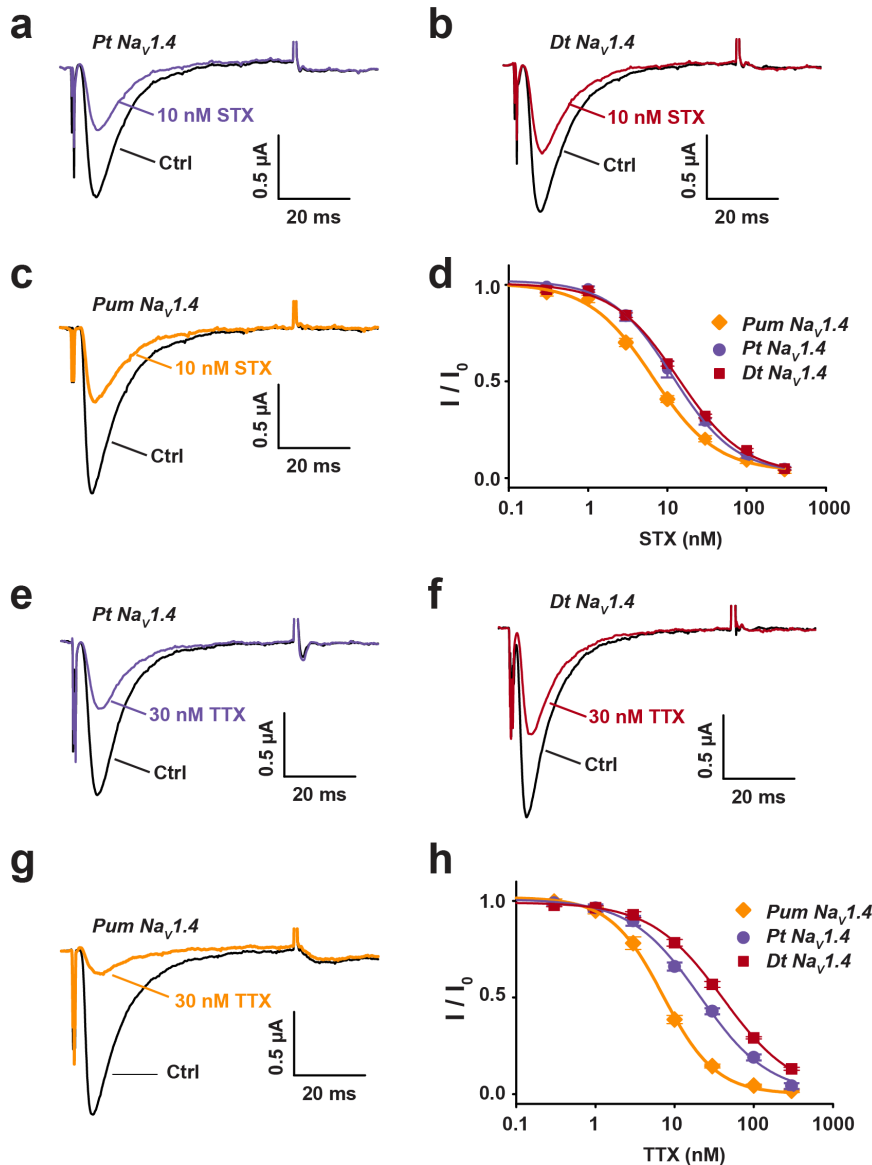

**Figure S11 Nav1.4s from poisonous animals are STX and TTX sensitive.** a-c, Exemplar recordings at 0 mV before (black) and after 10 nM STX application to *Xenopus* oocytes expressing a, Pt Nav1.4 (purple) b, Dt Nav1.4 (red), or c, Pum Nav1.4 (orange). d, STX Dose-response curves for Pt Nav1.4 (purple circles), Dt Nav1.4 (red squares), and Pum Nav1.4 (orange diamonds). Curves show fits to the Hill equation. ( $IC_{50} = 12.6 \pm 1.4$  nM,  $14.6 \pm 0.6$  nM, and  $7.3 \pm 0.5$  nM for Pt Nav1.4, Dt Nav1.4, and Pum Nav1.4, respectively. Errors are SEM. (n = 4). e-g, Exemplar recordings at 0 mV before (black) and after 30 nM TTX application to *Xenopus* oocytes expressing e, Pt Nav1.4 (purple), f, Dt Nav1.4 (red), or g, Pum Nav1.4 (orange). h, TTX Dose-response curves for Pt Nav1.4 (purple circles), Dt Nav1.4 (red squares), and Pum Nav1.4 (orange diamonds). Curves show fits to the Hill equation. ( $IC_{50} = 21.3 \pm 1.0$  nM,  $40.8 \pm 1.8$  nM, and  $6.2 \pm 0.4$  nM for Pt Nav1.4, Dt Nav1.4, and Pum Nav1.4, respectively. Errors are SEM. (n = 5-6).

29 October 2020

**Table S1 Na<sub>v</sub> Inactivation parameters**

|                    | Channel                                                         | V <sub>1/2</sub> inact | ΔV <sub>1/2</sub> inact | k <sub>inact</sub> | n  |
|--------------------|-----------------------------------------------------------------|------------------------|-------------------------|--------------------|----|
| <b>Bird</b>        | <b><i>Pum</i> Na<sub>v</sub>1.4</b>                             | -64.2 ±1.3             | n.a.                    | 4.8 ±0.1           | 14 |
|                    | <b><i>Pum</i> Na<sub>v</sub>1.4 + <i>Pk</i>Na<sub>v</sub>β2</b> | -66.5 ±1.4             | n.a.                    | 4.6 ±0.2           | 8  |
|                    | <b><i>Pum</i> Na<sub>v</sub>1.5</b>                             | -75.9 ±1.6             | n.a.                    | 4.2 ±0.5           | 6  |
|                    | <b><i>Pum</i> Na<sub>v</sub>1.4 N432T (DI)</b>                  | -61.2 ±1.6             | n.a.                    | 9.8 ±0.5           | 6  |
|                    | <b><i>Pum</i> Na<sub>v</sub>1.4 N830T (DII)</b>                 | -75.0 ±0.9             | -10.8 ±1.6              | 4.2 ±0.2           | 7  |
|                    | <b><i>Pum</i> Na<sub>v</sub>1.4 N1306T (DIII)</b>               | -65.3 ±1.0             | n.a.                    | 5.1 ±0.5           | 7  |
|                    | <b><i>Pum</i> Na<sub>v</sub>1.4 N1609T (DIV)</b>                | -74.5 ±1.7             | -10.3 ±2.1              | 4.9 ±0.1           | 3  |
|                    | <b><i>Pum</i> Na<sub>v</sub>1.4 N1609A (DIV)</b>                | -77.6 ±0.9             | -13.4 ±1.6              | 4.7 ±0.2           | 10 |
| <b>Human</b>       | <b><i>Hs</i> Na<sub>v</sub>1.4</b>                              | -60.5 ±0.8             | n.a.                    | 4.7 ±0.3           | 12 |
|                    | <b><i>Hs</i> Na<sub>v</sub>1.4 N1591T (DIV)</b>                 | -70.3 ±0.9             | -9.8 ±1.2               | 4.2 ±0.2           | 3  |
| <b>Rat</b>         | <b><i>Rn</i> Na<sub>v</sub>1.4</b>                              | -61.9 ±0.2             | n.a.                    | 6.1 ±0.2           | 4  |
|                    | <b><i>Rn</i> Na<sub>v</sub>1.4 N1584T (DIV)</b>                 | -88.9 ±0.4             | -27.0 ±0.4              | 12.6 ±0.4          | 6  |
| <b>Poison frog</b> | <b><i>Pt</i> Na<sub>v</sub>1.4</b>                              | -73.9 ±0.6             | n.a.                    | 5.9 ±1.4           | 3  |
|                    | <b><i>Pt</i> Na<sub>v</sub>1.4 (N1600T) (DIV)</b>               | -81.6 ±0.7             | -7.7 ±0.9               | 4.7 ±0.3           | 6  |
|                    | <b><i>Dt</i> Na<sub>v</sub>1.4</b>                              | -62.2 ±1.3             | n.a.                    | 5.6 ±0.5           | 8  |
|                    | <b><i>Dt</i> Na<sub>v</sub>1.4 (N1600T) (DIV)</b>               | -72.0 ±1.4             | -9.8 ±1.9               | 5.2 ±0.3           | 3  |



29 October 2020

**Table S2 Human→Poison frog Nav1.4 amino acid variants**

| Location (# of substitutions)  |                    | Human→poison frog | Location                          | Human→poison frog          |
|--------------------------------|--------------------|-------------------|-----------------------------------|----------------------------|
| N-term cytoplasmic domain (11) |                    | I41V              | VSD- II (9)                       | DII-S0 (1) K584Q           |
|                                |                    | E43D              |                                   | DII S2 (2) T641A           |
|                                |                    | E46V              |                                   | V645F                      |
|                                |                    | S51N              |                                   | DII S2-S3 loop (3) E655Y   |
|                                |                    | D52G              |                                   | Q659V                      |
|                                |                    | N58S              |                                   | I663V                      |
|                                |                    | K85Q              |                                   | DII S3-S4 loop (1) Q682E   |
|                                |                    | G94S              | PD-II (2)                         | DII-S6 (2) I807V           |
|                                |                    | S101T             |                                   | A830S                      |
|                                |                    | P104K             |                                   |                            |
| VSD-I (8)                      | DI S1 (4)          | L106M             | DII – DIII loop (10)              | A855I                      |
|                                |                    | M130F             |                                   | F923L                      |
|                                |                    | T138A             |                                   | L929Y                      |
|                                |                    | S146N             |                                   | T930R                      |
|                                |                    | S152A             |                                   | Q932E                      |
|                                |                    | L172F             |                                   | T946E                      |
|                                |                    | D180S             |                                   | D958T                      |
|                                |                    | L201T             |                                   | K961I                      |
|                                |                    | I210V             |                                   | A990T                      |
|                                |                    |                   |                                   | E991L                      |
| PD- I (21)                     | DI S5 (2)          | S248A             | VSD- III (5)                      | DIII S0 (1) L1029V/I*      |
|                                |                    | S259A             |                                   | DIII S1 (1) V1047I         |
|                                | DI S5-S6 loop (11) | D319S             |                                   | DIII S2 (1) R1071K         |
|                                |                    | A320T             |                                   | DIII S5-S6 loop (2) K1215R |
|                                |                    | I322L             |                                   | E1257K/N*                  |
|                                |                    | A346S             | VSD- IV (15)                      | DIV S0 (4) Q1341V          |
|                                |                    | G352S             |                                   | K1350P                     |
|                                |                    | E354T             |                                   | V1359I                     |
|                                |                    | S368N             |                                   | T1360S                     |
|                                |                    | Y369F             |                                   | DIV S1 (3) T1367F          |
|                                |                    | T371S             |                                   | V1377I                     |
|                                |                    | S373N             |                                   | V1381I                     |
|                                |                    | F376Y             |                                   | DIV S2 (5) L1389E          |
|                                | DI S6 (8)          | S415A             |                                   | Y1395F                     |
|                                |                    | I419V             |                                   | G1407T                     |
|                                |                    | A431D             |                                   | V1410F                     |
|                                |                    | A439Q             |                                   | Y1420F                     |
|                                |                    | D441A             | PD-IV (4)                         | DIV S3 (1) L1435I          |
|                                |                    | K442L             |                                   | DIV S3-S4 (1) K1448E       |
|                                |                    | E446K             |                                   | DIV S5-S6 loop (1) L1566I  |
| DI-DII Loop (10)               |                    | Q450D             | DIV S6 (3)                        | S1581A                     |
|                                |                    | E463G             |                                   | V1599I                     |
|                                |                    | K464Q             | C-terminal cytoplasmic domain (3) | S1618G                     |
|                                |                    | K495M             |                                   | Q1758H                     |
|                                |                    | K536T             |                                   | L1649M                     |
|                                |                    | I548V             |                                   | E1658D                     |
|                                |                    | H560Q             |                                   |                            |
|                                |                    | K562T/P*          |                                   |                            |
|                                |                    | H572N             |                                   |                            |
|                                |                    | I576K             |                                   |                            |
|                                |                    | N578D             |                                   |                            |
|                                |                    |                   |                                   |                            |

Pore domain (PD) and voltage sensor domain (VSD) are indicated.  
Magenta residues are variants shared with (24).

29 October 2020

Variations are denoted using the human residue identity, *Pt* Nav1.4 number, and poison frog residue identity.

\* indicates site where *Pt* Nav1.4 and *Dt* Nav1.4 differ.

29 October 2020

**Table S3 Comparison of the functional effects of S6 mutations**

| Channel                         | BTX resistant? | Activation shift?<br>$\Delta V_{1/2 \text{ act}}$ (mV) | Inactivation shift?<br>$\Delta V_{1/2 \text{ inact}}$ (mV) | Decrease in current density?<br>(fold change) |
|---------------------------------|----------------|--------------------------------------------------------|------------------------------------------------------------|-----------------------------------------------|
| <i>Pum</i> Nav1.4 N432T (DI)    | No             | No                                                     | No                                                         | No                                            |
| <i>Pum</i> Nav1.4 N830T (DII)   | No             | No                                                     | Yes; -10.8 $\pm$ 1.6                                       | Yes; 14.8                                     |
| <i>Pum</i> Nav1.4 N1306T (DIII) | No             | No                                                     | No                                                         | No                                            |
| <i>Pum</i> Nav1.4 N1609T (DIV)  | Yes            | Yes; +20.5 $\pm$ 1.5                                   | Yes; -10.3 $\pm$ 2.1                                       | Yes; 4.9                                      |
| <i>Pum</i> Nav1.4 N1609A (DIV)  | No             | Yes; +19.6 $\pm$ 1.6                                   | Yes; -13.4 $\pm$ 1.6                                       | Yes; 4.1                                      |
| <i>Hs</i> Nav1.4 N1591T (DIV)   | Yes            | Yes; +16.9 $\pm$ 2.7                                   | Yes; -9.8 $\pm$ 1.2                                        | Yes; 2.2                                      |
| <i>Rn</i> Nav1.4 N1584T (DIV)   | Yes            | Yes; +18.0 $\pm$ 0.6                                   | Yes; -27.0 $\pm$ 0.4                                       | Yes; 10.3                                     |
| <i>Pt</i> Nav1.4 (N1600T) (DIV) | No             | No                                                     | Yes; -7.7 $\pm$ 0.9                                        | No*                                           |
| <i>Dt</i> Nav1.4 (N1600T) (DIV) | No             | No                                                     | Yes; -9.8 $\pm$ 1.9                                        | No*                                           |

Data represent measurements in transfected HEK293 cells

\* indicates substantial current density loss in *Xenopus* oocytes.

29 October 2020

**Table S4 Recovery time from anesthesia (minutes)**

|                              | <b>PBS</b> | <b>BTX</b> | <b>STX</b> | <b>TTX</b> |
|------------------------------|------------|------------|------------|------------|
| <b><i>X. laevis</i></b>      | 29 ± 1     | 15 ± 2     | N/A        | N/A        |
| <b><i>P. leucomystax</i></b> | 169 ± 12   | 70 ± 20    | N/A        | 720 ± 30   |
| <b><i>P. terribilis</i></b>  | 10 ± 1     | 14 ± 2     | 72 ± 8     | 354 ± 6    |
| <b><i>D. tinctorius</i></b>  | 35 ± 4     | 38 ± 3     | 32 ± 14    | 283 ± 57   |
| <b><i>M. aurantiaca</i></b>  | 56 ± 11    | 60 ± 10    | 52 ± 3     | 1011 ± 51  |

Values are average ± S.E.M.

29 October 2020

## Gene assembly scripts.

```
#!/bin/sh

#this script should search for reads matching sodium channels, create a seed
file from MiSeq and HiSeq reads, and start a PRICE assembly of the sodium
channel using these seeds

#these steps use blatq to search for reads matching the sodium channel
echo "$@"_starting blatq search to pull seeds for PRICE

blatq -t=dna /data/jdumbacher/Pitohui_Nav/BlastLibs/SCN4A-Corvus_cornix-
Genomic.fa
/data/jdumbacher/Pitohui_Nextera/Pitohui_HiSeq_data/Final_Fastq/Pitohui157
_HiSeq_ALLDATA.trimmed.fastq
/data/jdumbacher/Pitohui_Nav/BlastResults/SCN4A-
Corvus_cornix_HiSeq_ALLDATA_matches.m8 -out=blast8

blatq -t=dna /data/jdumbacher/Pitohui_Nav/BlastLibs/SCN4A-Corvus_cornix-
Genomic.fa
/data/jdumbacher/Pitohui_Nextera/Pitohui_MiSeq_data/Final_BBmerged_Trimmed
_Files/Pitohui157_MiSeq_ALLDATA_trimmed.fastq
/data/jdumbacher/Pitohui_Nav/BlastResults/SCN4A-
Corvus_cornix_MiSeq_ALLDATA_matches.m8 -out=blast8

echo "$@" Blatq done

# Step 2 excerpt reads by id:

echo "$@"Now starting to excerpt reads with blatq hits by ID

/data/jdumbacher/bin/excerptByIDs
/data/jdumbacher/Pitohui_Nav/BlastResults/SCN4A-
Corvus_cornix_HiSeq_ALLDATA_matches.m8
/data/jdumbacher/Pitohui_Nextera/Pitohui_HiSeq_data/Final_Fastq/Pitohui157
_HiSeq_ALLDATA.trimmed.fastq >
/data/jdumbacher/Pitohui_Nav/BlastResults/SCN4A-
Corvus_cornix_HiSeq_ALLDATA_matches.fastq

/data/jdumbacher/bin/excerptByIDs
/data/jdumbacher/Pitohui_Nav/BlastResults/SCN4A-
Corvus_cornix_MiSeq_ALLDATA_matches.m8
/data/jdumbacher/Pitohui_Nextera/Pitohui_MiSeq_data/Final_BBmerged_Trimmed
_Files/Pitohui157_MiSeq_ALLDATA_trimmed.fastq >
/data/jdumbacher/Pitohui_Nav/BlastResults/SCN4A-
Corvus_cornix_MiSeq_ALLDATA_matches.fastq

echo "$@"done excerpting reads

cat /data/jdumbacher/Pitohui_Nav/BlastResults/SCN4A-
Corvus_cornix_HiSeq_ALLDATA_matches.fastq
/data/jdumbacher/Pitohui_Nav/BlastResults/SCN4A-
Corvus_cornix_MiSeq_ALLDATA_matches.fastq >
/data/jdumbacher/Pitohui_Nav/BlastResults/SCN4A-Corvus_cornix.seeds.fastq
```

29 October 2020

```

echo "$@"number of seeds in seed file,
/data/jdumbacher/Pitohui_Nav/BlastResults/SCN4A-Corvus_cornix.seeds.fastq

grep -c "@" /data/jdumbacher/Pitohui_Nav/BlastResults/SCN4A-
Corvus_cornix.seeds.fastq

# for larger read sets, assemble initial reads using spades:

python /data/jdumbacher/SPAdes-3.9.0-Linux/bin/spades.py --careful -s
/data/jdumbacher/Pitohui_Nav/BlastResults/SCN4A-Corvus_cornix.seeds.fastq
-o /data/jdumbacher/Pitohui_Nav/BlastResults/SCN4A-
Corvus_cornix.assembled-seeds

# Assemble using PRICE (For PRICE assemblies - use note for PRICE
assemblies Labnotes 25 November 2014)

echo "$@"Now starting PRICE assembly using reads

PriceTI -fp
/data/jdumbacher/Pitohui_Nextera/Pitohui_MiSeq_data/Final_BBmerged_Trimmed
_Files/Pitohui157_Run1_BBUnmerged_trimmed_paired_R1.fastq
/data/jdumbacher/Pitohui_Nextera/Pitohui_MiSeq_data/Final_BBmerged_Trimmed
_Files/Pitohui157_Run1_BBUnmerged_trimmed_paired_R2.fastq 549 -fp
/data/jdumbacher/Pitohui_Nextera/Pitohui_HiSeq_data/Final_Fastq/Pitohui157
_HiSeq_PE_trimmed_R1.fastq
/data/jdumbacher/Pitohui_Nextera/Pitohui_HiSeq_data/Final_Fastq/Pitohui157
_HiSeq_PE_trimmed_R2.fastq 482 -icf
/data/jdumbacher/Pitohui_Nav/BlastResults/SCN4A-Corvus_cornix.assembled-
seeds/contigs.fasta 1 1 5 -mol 30 -mpi 90 -MPI 85 -nc 50 -a 10 -target 85
1 1 1 -o /data/jdumbacher/Pitohui_Nav/PriceAssemblies/Pitohui_SCN4A-
from_Corvus_cornix.Ass-seeds.fa -o
/data/jdumbacher/Pitohui_Nav/PriceAssemblies/Pitohui_SCN4A-
from_Corvus_cornix.ass-seeds.priceq -maxHp 25 -logf
/data/jdumbacher/Pitohui_Nav/PriceAssemblies/Pitohui_SCN4A-
from_Corvus_cornix.ass-seeds.log 2>
/data/jdumbacher/Pitohui_Nav/PriceAssemblies/Pitohui_SCN4A-
from_Corvus_cornix.ass-seeds.errorlog

```
